1       **The Genome of the Charophyte Alga *Penium margaritaceum* Bears Footprints of the**  
2                                               **Evolutionary Origins of Land Plants**

3  
4  
5   Chen Jiao<sup>1,12</sup>, Iben Sørensen<sup>2,12</sup>, Xuepeng Sun<sup>1,12</sup>, Honghe Sun<sup>1</sup>, Hila Behar<sup>3,4,5,6</sup>, Saleh Alseekh<sup>7</sup>,  
6   Glenn Philippe<sup>2</sup>, Kattia Palacio Lopez<sup>8</sup>, Li Sun<sup>8</sup>, Reagan Reed<sup>8</sup>, Susan Jeon<sup>8</sup>, Reiko Kiyonami<sup>9</sup>,  
7   Sheng Zhang<sup>10</sup>, Alisdair R. Fernie<sup>7</sup>, Harry Brumer<sup>3,4,5,6</sup>, David S. Domozych<sup>8\*</sup>, Zhangjun Fei<sup>1,11\*</sup>  
8                                               and Jocelyn K. C. Rose<sup>2\*</sup>.

9  
10 <sup>1</sup>Boyce Thompson Institute, Ithaca, NY, USA. <sup>2</sup>Plant Biology Section, School of Integrative Plant  
11 Science, Cornell University, Ithaca, NY, USA. <sup>3</sup>Michael Smith Laboratories, University of British  
12 Columbia, 2185 East Mall, Vancouver, BC Canada V6T 1Z4. <sup>4</sup>Department of Biochemistry and  
13 Molecular Biology, University of British Columbia, 2350 Health Sciences Mall, Life Sciences  
14 Centre, Vancouver, BC, Canada V6T 1Z3. <sup>5</sup>Department of Botany, University of British Columbia,  
15 3200-6270 University Blvd., Vancouver, BC, Canada, V6H 1Z4. <sup>6</sup>Department of Chemistry,  
16 University of British Columbia, 2036 Main Mall, Vancouver, BC, Canada, V6T 1Z4. <sup>7</sup>Max-  
17 Planck-Institute of Molecular Plant Physiology, Potsdam-Golm, Germany. <sup>8</sup>Skidmore College,  
18 Saratoga Springs, New York, USA. <sup>9</sup>Thermo Fisher Scientific, 355 River Oaks Parkway, San Jose,  
19 CA 95134, USA. <sup>10</sup>Institute of Biotechnology, Cornell University, Ithaca, NY, USA. <sup>11</sup>U.S.  
20 Department of Agriculture-Agricultural Research Service, Robert W. Holley Center for  
21 Agriculture and Health, Ithaca, NY, USA.

22  
23  
24 <sup>12</sup>These authors contributed equally to this work.

25  
26 \*Correspondence should be addressed to Jocelyn K. C. Rose ([jr286@cornell.edu](mailto:jr286@cornell.edu)), Zhangjun Fei  
27 ([zf25@cornell.edu](mailto:zf25@cornell.edu)) and David S. Domozych ([ddomoz@skidmore.edu](mailto:ddomoz@skidmore.edu)).  
28  
29

30 **ABSTRACT**

31 The colonization of land by plants was a pivotal event in the history of the biosphere, and yet the  
32 underlying evolutionary features and innovations of the first land plant ancestors are not well  
33 understood. Here we present the genome sequence of the unicellular alga *Penium margaritaceum*,  
34 a member of the Zygnematophyceae, the sister lineage to land plants. The *P. margaritaceum*  
35 genome has a high proportion of repeat sequences, which are associated with massive segmental  
36 gene duplications, likely facilitating neofunctionalization. Compared with earlier diverging plant  
37 lineages, *P. margaritaceum* has uniquely expanded repertoires of gene families, signaling  
38 networks and adaptive responses, supporting its phylogenetic placement and highlighting the  
39 evolutionary trajectory towards terrestrialization. These encompass a broad range of physiological  
40 processes and cellular structures, such as large families of extracellular polymer biosynthetic and  
41 modifying enzymes involved in cell wall assembly and remodeling. Transcriptome profiling of  
42 cells exposed to conditions that are common in terrestrial habitats, namely high light and  
43 desiccation, further elucidated key adaptations to the semi-aquatic ecosystems that are home to the  
44 Zygnematophyceae. Such habitats, in which a simpler body plan would be advantageous, likely  
45 provided the evolutionary crucible in which selective pressures shaped the transition to land.  
46 Earlier diverging charophyte lineages that are characterized by more complex land plant-like  
47 anatomies have either remained exclusively aquatic, or developed alternative life styles that allow  
48 periods of desiccation.

49

50

## 51 INTRODUCTION

52 One of the most momentous evolutionary events in the history of life on Earth is thought to have  
53 occurred approximately 500 million years ago (Mya), when a single lineage of freshwater algae  
54 developed the capacity to colonize land (Delwiche and Timme, 2011). These pioneering  
55 oxygenating auxotrophs had a profound effect on the atmosphere and geochemical composition of  
56 the soil (Rensing, 2018; Delwiche and Cooper, 2015) and paved the way for an explosion of land  
57 plant diversification, and the evolution of other branches of terrestrial life. A key question in  
58 understanding the origins of life on land is the nature of the adaptive traits that enabled this  
59 remarkable transition.

60 Green plants (Viridiplantae) are comprised of the chlorophyte algae and the monophyletic  
61 group Streptophyta, comprising land plants (embryophytes) and the charophyte algae (Fig. 1A).  
62 Two groups of charophyte lineages have been defined: the earlier diverging Mesostigmatophyceae  
63 together with Chlorokybophyceae and Klebsormidophyceae; and the later diverging  
64 Charophyceae, Coleochaetophyceae and Zygnematophyceae. There is now considerable  
65 molecular evidence that the Zygnematophyceae are the closest relatives to land plants (Delwiche  
66 and Cooper, 2015; Wodniok et al., 2011; Leebens-Mack et al., 2019). This may be considered  
67 somewhat paradoxical, in that members of the Zygnematophyceae exhibit a notably simpler body  
68 plan (e.g. unicells, filaments) than taxa of the Charaophyceae or Coleochaetophyceae (e.g.  
69 complex branched filamentous aggregates, pseudoparenchymatous forms) and also undergo sexual  
70 reproduction via conjugation rather than oogamy. However, it has been postulated that these less  
71 complex characteristics of the Zygnematophyceae represent a manifestation of a reduction trend  
72 in their evolutionary history (Delwiche and Timme, 2011). The smaller and simpler growth habit,  
73 with an increased capacity to tolerate water stress, may have been advantageous to life in shallow,  
74 ephemeral wetlands, i.e., habitats that may have been common during the time of algal emergence  
75 onto land.

76 Extant charophytes have a remarkable range of body plans, even though fossil evidence  
77 suggests that they represent only a small proportion of the diversity that previously existed (Feist  
78 et al., 2005). This morphological diversity and its underlying developmental machinery provide a  
79 rich set of opportunities to elucidate adaptations that may have been critical for the invasion of  
80 land. Insights into the evolutionary origins and adaptive traits of taxa have been gleaned through  
81 analysis of the only two available genome sequences in the six Charophyte orders,

82 Klebsormidophyceae (*Klebsormidium nitens*; Hori et al., 2014) and Charophyceae (*Chara braunii*;  
83 Nishiyama et al., 2018). In the earlier diverging *K. nitens*, the ability to synthesize certain  
84 phytohormones and associated signaling intermediates, along with a mechanism to cope with high  
85 light, represent physiological adaptations that were likely key for terrestrialization. The genome  
86 sequence of the later diverging *C. braunii*, revealed further innovations, including a reactive  
87 oxygen species response (ROS) network, the production of stress and storage proteins, components  
88 of canonical phytohormone biosynthetic and response pathways and elaboration of transcription  
89 factors for oogamous gamete production. However, a critical gap in the genomic information  
90 required to elucidate the evolutionary arc from aquatic to terrestrial plant life has been a well-  
91 defined genome representing the Zygnematophyceae, the sister group to embryophytes.

92 Here, we present the genome and transcriptomes of the unicellular desmid *Penium*  
93 *margaritaceum*, an archetype of the Zygnematophyceae with the simplest of body plans (Fig. 1B).  
94 *P. margaritaceum* has an architecturally complex land plant-like cell wall (Domozych et al., 2007;  
95 2014; Sørensen et al., 2011) and secretes mucilaginous polysaccharides (Fig. 1C, D), which may  
96 be associated with its adaptation to living in transient wetlands that experience frequent drying. In  
97 this study, we sought to identify suites of genes that facilitate adaptation to an ephemeral semi-  
98 terrestrial life style, and to determine whether the relatively simple morphology of *P.*  
99 *margaritaceum* is associated with genome features, such as reductionism compared with other  
100 charophyte lineages that have more complex multicellular body plans. We further investigated the  
101 responses of *P. margaritaceum* to a range of abiotic stresses, in order to elucidate the adaptations  
102 that enable tolerance of the environmental challenges imposed by terrestrial habitats.

103

## 104 **RESULTS**

### 105 **Genome and gene set of *P. margaritaceum***

106 We generated a total of 954 Gb Illumina paired-end and 433 Gb mate-pair sequences  
107 (Supplementary Table 1), representing 201× and 92× coverage, respectively, of the haploid  
108 genome of *P. margaritaceum* with an estimated size of 4.7 Gb (Supplementary Fig. 1A). Assembly  
109 of these sequences resulted in 332,786 scaffolds, with a cumulative size of 3.661 Gb and an N50  
110 of 116.1 kb. The nuclear assembly captured most of the k-mers in the Illumina reads and low  
111 frequency k-mers representing sequencing errors were absent (Supplementary Fig. 1B). In addition,  
112 the mapping rates of genomic and RNA-Seq reads against the nuclear assembly were 97.5% and

113 96.8%, respectively (Supplementary Table 2). The single nucleotide polymorphism (SNP)  
114 frequency distribution on the 100 longest scaffolds was consistent with a haploid genome  
115 (Supplementary Fig. 1C). The mitochondrial and chloroplast genomes were also fully assembled,  
116 and comprised 95,332 and 145,411 nucleotides, respectively (Supplementary Fig. 2).

117 The assembly contains a large proportion (80.6%) of repeat sequences (Supplementary  
118 Table 3), particularly long terminal repeat (LTR) retrotransposons and simple repeats (Fig. 2A).  
119 Unlike land plants and *C. braunii*, in which *gypsy* is the predominant LTR family, the *P.*  
120 *margaritaceum* genome has a large proportion of *copia* retrotransposons, which are rare in other  
121 green algae and absent from *C. braunii* (Nishiyama et al. 2018). An estimation of divergence time  
122 indicated that the *copia* expansion in the *P. margaritaceum* genome was relatively recent, around  
123 2.1 Mya (Fig. 2B). Retrotransposons carrying tyrosine recombinases, such as the DIRS and Ngaro  
124 families, which are found in some chlorophytes and both *C. braunii* and *K. nitens* genomes, are  
125 not present in *P. margaritaceum* and land plants (Fig. 2A).

126 We predicted 52,333 high-confidence protein-coding genes in the *P. margaritaceum* genome,  
127 of which 99.3% were supported either by Illumina RNA-Seq data, or by homologs in the NCBI  
128 non-redundant protein database. Assessment of gene space completeness using BUSCO (Simão et  
129 al., 2015) indicated a low rate of missing genes (8.25%), but the fragmented gene rate was  
130 relatively high (21.45%). To inform the annotation, we performed transcriptome sequencing with  
131 PacBio Iso-Seq technology, which generated 52,134 full-length transcripts consisting of 73,813  
132 isoforms. These PacBio transcripts, together with 145,267 representative transcripts assembled  
133 from Illumina RNA-Seq data, were used to build a master gene set by integrating with the high-  
134 confidence gene models. The final master gene set consisted of 53,262 genes (47,863 from the  
135 high-confidence gene models, 2,391 from the PacBio transcripts and 3,008 from the Illumina  
136 transcript data). The missing and fragmented gene rates of the master gene set were 2.31% and  
137 13.20%, respectively, and the complete BUSCO rate was 84.49% (Supplementary Table 4).

138

### 139 **Genome and gene family evolution**

140 Orthologous genes among *P. margaritaceum* and 13 representative species spanning the green  
141 plant lineage were identified. Phylogenetic analysis of low-copy orthologous groups confirmed  
142 the close relationship between *P. margaritaceum* and land plants, and indicated that *P.*  
143 *margaritaceum* diverged from the common ancestor of land plants around 663-552 Mya (Fig. 3A).

144 This Proterozoic separation substantially predates a proposed crown origin of embryophytes 492-  
145 461 Mya in the Phanerozoic (middle Cambrian-early Ordovician), but is consistent with a recent  
146 estimate (Morris et al., 2108). The *P. margaritaceum* genome has not undergone any whole  
147 genome duplication (WGD) events (Supplementary Fig. 3), unlike the multiple rounds that have  
148 occurred in land plants (Van de Peer et al., 2017). However, substantial segmental gene  
149 duplications were found in the *P. margaritaceum* genome, which is consistent with the high TE  
150 abundance, given that massive segmental gene duplications are often found in organisms with a  
151 high TE content (Panchy et al., 2016).

152 We looked for evidence of the morphological and physiological adaptations and key traits  
153 associated with terrestrialization through the reconstruction of gene family evolution, focusing on  
154 gene family expansions (Fig. 3A; Supplementary Table 5). A total of 11 expanded gene families  
155 ( $P < 0.05$ ) in the ancestor of charophytes following separation from chlorophytes, were identified,  
156 while a particularly large number of expanded gene families was evident in the common ancestor  
157 of *P. margaritaceum* and land plants (N=124), compared to family expansions in earlier algal  
158 lineages. Given that charophytes contain paraphyletic lineages and that the Zygnematophyceae,  
159 including *P. margaritaceum*, is the closest lineage to land plants, this suggests stepwise gene  
160 family expansion (Catarino et al., 2016). The expanded gene families in *P. margaritaceum* were  
161 mostly associated with responses to stresses, such as water deprivation, cold, bacteria, and  
162 oxidative stress, as well as the production and signaling of the phytohormones abscisic acid (ABA),  
163 auxin (AUX), ethylene (ETH) and jasmonic acid (JA). Other substantially expanded gene  
164 categories related to protein phosphorylation and cell wall organization (Supplementary Table 6).  
165

### 166 **Transcription factors and transcriptional regulators**

167 The *P. margaritaceum* genome encodes 935 transcription factors (TFs) and 454 transcription  
168 regulators (TRs) (Supplementary Table 7 and 8), which is substantially more than those in either  
169 *K. nitens* (292 and 332, respectively) or *C. braunii* (496, 202). This contradicts the notion that  
170 morphological complexity correlates with the size of the TF/TR infrastructure (Lang et al., 2010)  
171 (Supplementary Fig. 4). The GRAS, NAC, LOB, bZIP, bHLH, WRKY and AP2/ERF-ERF  
172 families, all of which have been associated with abiotic stress responses in embryophytes, showed  
173 substantial expansions compared with other algal lineages (Fig. 3B). Moreover, the GRAS and  
174 BBR-BPC TF families, as well as specific subfamilies of the bHLH, WRKY, NAC and AP2/ERF-

175 ERF families, may have originated in the Zygnematophyceae (Supplementary Fig. 5-7). For  
176 example, the *P. margaritaceum* genome encodes 15 proteins that are ancestral orthologs of the  
177 DREB subfamily of AP2/ERF-ERF TFs, but corresponding orthologs have not been found in other  
178 algae (Supplementary Fig. 7). In land plants, these regulatory proteins are involved in responses  
179 to abiotic stresses, such as cold, dehydration, salinity and heat (Agarwal et al., 2017).

180         Among the *P. margaritaceum* TF families, a notable feature is the remarkable large size of  
181 the GRAS family (291; Fig. 3B). Plant GRAS genes, named after *GIBBERELLIN-INSENSITIVE*  
182 (*GAI*), Repressor of *gal-3* (*RGA*) and *SCARECROW* (*SCR*), together with SCR-LIKEs (SCLs),  
183 may have originated in bacteria (Zhang et al. 2012) and are present in land plants and some  
184 Zygnematophyceae (Engstrom, 2011; Delaux et al., 2015). In land plants, they have functionally  
185 diversified to regulate processes that are inherent to complex multicellular body plans and three-  
186 dimensional architecture, including meristem development, controlling cell division and  
187 expansion in roots and shoots, vascular development and seed maturation, as well as stress  
188 responses (Bolle, 2004; Ma et al., 2010). This functional divergence was hypothesized to occur  
189 after terrestrialization, as algal GRAS proteins form a monophyletic clade located outside of the  
190 land plant group (Hernandez-Garcia et al., 2019). However, we found that while most *P.*  
191 *margaritaceum* GRAS proteins clustered within the algal group (Fig. 3C), four clustered as an  
192 outgroup with a subgroup of land plant GRAS proteins (Fig. 3C). This suggests that GRAS  
193 proteins diverged in the Zygnematophyceae prior to the emergence of embryophytes.

194

### 195 **Phytohormone biosynthesis and signaling**

196 In land plants, interlinked sets of phytohormone signaling pathways orchestrate the exquisitely  
197 complex cellular metabolic networks, developmental patterning, and systems that provide  
198 protection against environmental stresses, allowing exploitation of essentially all terrestrial  
199 habitats. The evolutionary origins of these phytohormones remains an intriguing question. A wide  
200 range of algal lineages, including charophytes, are capable of synthesizing and responding to a  
201 range of classical plant hormones but their physiological roles are typically not well understood  
202 (Ju et al., 2015; Lu and Xu, 2015; Ohtaka et al., 2017; Holzinger and Pichrtova, 2016). Moreover,  
203 the genomes of the two sequenced charophytes, *K. nitens* and *C. braunii*, do not encode the  
204 complete set of orthologs of land plant hormone biosynthesis and signaling pathways (Hori et al.,  
205 2014; Nishiyama et al., 2018) (Fig. 4; Supplementary Table 9; Supplementary Fig. 8-25). We

206 investigated the genome of *P. margaritaceum* to find evidence of evolutionary innovations in the  
207 Zygnematophyceae associated with the F-box-mediated (auxin, JA, GA and strigolactone [SL])  
208 and two-component (cytokinin [CK] and ETH) signaling pathways, as well as the ABA, salicylic  
209 acid (SA) and brassinosteroid (BR) pathways (Fig. 4).

210 Auxin coordinates a spectrum of growth and developmental processes via biosynthetic and  
211 signaling pathways that are conserved across land plants (Bowman et al., 2019). Various algal  
212 lineages also synthesize auxin and respond to its exogenous application, with cytological and  
213 structural changes that are similar to those in land plants (Kiseleva et al., 2012; Ohtaka et al., 2017).  
214 However, both *P. margaritaceum* and *C. braunii* (Nishiyama et al. 2018) lack the primary auxin  
215 biosynthetic genes encoding tryptophan aminotransferase (TAA) and flavin-containing  
216 monooxygenases (YUCCA) (Supplementary Table 9). TAA and the paralogous family of  
217 alliinases are derived from a single land plant ancestor (Romani, 2017; Bowman et al., 2019)  
218 (Supplementary Fig. 8), and the YUCCA family is thought to have been acquired via horizontal  
219 gene transfer from bacteria to the ancestral land plant (Yue et al., 2012). We conclude that  
220 charophytes may use one of the alternative auxin biosynthetic pathways that have been proposed  
221 (Tivendale et al., 2014). In addition to the absence of a canonical auxin biosynthetic pathway,  
222 neither *C. braunii* nor *P. margaritaceum* encode F-box genes that cluster with the land plant auxin  
223 receptor, *TIR1*, or its paralog *COII*, which encodes a JA receptor, although *K. nitens* has one  
224 homolog that is likely the ancestor of both *TIR1* and *COII* (Bowman et al., 2019) (Supplementary  
225 Fig. 9). Land plant auxin signaling involves binding of the TR AUX/IAA to the co-repressor  
226 TOPLESS, TIR1 and AUXIN RESPONSE FACTOR (ARF) TFs, through its I, II and PB1  
227 domains, respectively (Leyser, 2018). *C. braunii* has two AUX/IAA genes and both lack domains  
228 I and II, while one of two *P. margaritaceum* AUX/IAA genes has prototypes of both domains  
229 (Supplementary Fig. 10A, Supplementary Table 9). This is reflected in a phylogenetic tree where  
230 the *C. braunii* AUX/IAA proteins cluster within a monoclade formed by non-canonical AUX/IAAs  
231 (NCIAAs), which lack domains I and II, whereas the *P. margaritaceum* homologs represent the  
232 ancestor of land plant canonical AUX/IAAs (Supplementary Fig. 10B). ARFs are ancient,  
233 predating the formation of a canonical auxin signaling network, and are categorized in land plants  
234 into three classes (A, B and C). The evolutionary history of these domains has not yet been fully  
235 resolved with the support of genome sequences (Martin-Arevalillo et al., 2019) (Supplementary  
236 Fig. 11A). The *C. braunii* genome encodes a single C-ARF, whereas the *P. margaritaceum*



237 genome has two ARFs that cluster together as the ancestor of A/B-ARFs. Homology modeling  
238 revealed a high degree of protein structure conservation between the two *P. margaritaceum* ARFs  
239 and ARF1 (B-ARF) from the model land plant *Arabidopsis thaliana*, particularly in proximity to  
240 the dimerization domain (Supplementary Fig. 11B). This supports a model where both C and A/B  
241 classes were present in the common ancestor of *P. margaritaceum* and land plants, and that loss  
242 of C-ARFs has occurred sporadically across charophyte lineages (Martin-Arevalillo et al., 2019).

243 Auxin transport and homeostasis rely on PIN and ABCB exporters, AUX1/LAX influx  
244 carriers and PIL proteins (Swarup and Bhosale, 2019). All of these transporters are found in the *P.*  
245 *margaritaceum* genome (Supplementary Table 9), while AUX1/LAXs and PILs are absent in *C.*  
246 *braunii* (Nishiyama et al., 2018). In land plants, polar auxin transport (PAT) is a key factor in the  
247 spatiotemporal control of development by asymmetric subcellular auxin distribution and is  
248 mediated by plasma membrane (PM) localized PIN proteins (Swarup and Bennett, 2014). The  
249 presence of PAT (Boot et al., 2012) and the polarized expression of PINs in charophytes (Žabka  
250 et al., 2016) suggest that PIN-mediated PAT may have originated in charophytes, although their  
251 relocalization to the plasma membrane from an ancestral form in the endoplasmic reticulum may  
252 have been key to the development of early land plants (Viaene et al, 2012). In conclusion, while it  
253 appears that the canonical auxin biosynthetic and signaling pathways were derived from the  
254 assembly and neofunctionalization of molecular interactions that existed in the ancestral land plant,  
255 the *P. margaritaceum* genome sequence has revealed additional core auxin signaling components  
256 that likely emerged in the Zygnematophyceae.

257 Genes required for the biosynthesis of JA and GA, and the associated canonical receptors  
258 and signaling elements, are absent from *P. margaritaceum* (Fig. 4; Supplementary Table 9),  
259 although both hormones have been detected in some charophytes (Kazmierczak and Rosiak, 2000;  
260 Hori et al., 2014). DELLA proteins are central repressors of GA-dependent processes and evolved  
261 from a subset of GRAS family proteins. However, while GRAS TFs are particularly abundant in  
262 *P. margaritaceum*, none has the key N-terminal domain for interaction with the GID1 GA receptor  
263 (Hernández-García, et al. 2019). Our data are congruent with the idea that the DELLA proteins  
264 emerged in the land plant ancestor where they evolved a transcriptional regulatory function, and  
265 were then recruited to form the GID1-DELLA signaling with the emergence of vascular land plants  
266 (Hernández-García, et al. 2019).

267 Similarly, there is evidence that canonical SL hormone signaling, which contributes to  
268 numerous developmental processes in land plants, including shoot branching, the initiation of  
269 lateral roots and leaf development, emerged in land plants through the recruitment of a pre-existing  
270 SL-based signaling system (Walker et al., 2019). We found that of the known biosynthetic pathway  
271 genes, *P. margaritaceum* only has an ortholog of *MAX1* (Fig. 4). Moreover, the *P. margaritaceum*  
272 genome encodes orthologs of only one SL signaling component, MAX2. While it has been  
273 reported that some charophytes have detectable levels of SLs and respond to their exogenous  
274 application (Delaux et al. 2015), the presence of SLs in charophytes has been questioned (Walker  
275 et al., 2019). The absence of a biosynthetic or signaling framework in *P. margaritaceum* is more  
276 consistent with the idea that SL synthesis originated at the base of land plants.

277 In contrast to the F-box mediated hormones, there is considerable mechanistic conservation  
278 of the two-component hormone systems among streptophytes, consistent with early establishment  
279 deep in the lineage. There are structural differences between the cytokinin ligands synthesized by  
280 algae and angiosperms (Bowman et al., 2019), and the latter utilize adenylate-IPTs to generate  
281 *trans*-zeatin, while the class I tRNA-IPTs encoded by *P. margaritaceum* and other streptophytes  
282 produce *cis*-zeatin (Fig. 4; Supplementary Fig. 12). Notably, the *P. margaritaceum* genome lacks  
283 the LOG protein that, in land plants, converts inactive cytokinin nucleotides to biologically active  
284 forms (Kurakawa et al., 2007), while LOG is present in all of the other selected algal genomes,  
285 suggesting an alternative mechanism for cytokinin activation in *P. margaritaceum*. Key cytokinin  
286 signaling pathway components are found in *P. margaritaceum* and other algal genomes, except  
287 for the RR-A and RR-B response regulators, which are absent in *C. braunii*, again indicating  
288 functional substitution by other genes (Nishiyama et al., 2018). The ethylene pathway also has  
289 similarly highly conserved signaling elements, including ETR, CTR1, EBF, and EIN3, which are  
290 present in all three completed charophycean algal genome sequences (Fig. 4; Supplementary Table  
291 9). The ancient evolution of ethylene as a signaling molecule was also demonstrated through  
292 physiological and transcriptome studies of *Spirogyra pratensis*, a filamentous close relative of *P.*  
293 *margaritaceum* in the Zygnematophyceae, showing regulation of abiotic stress responses, cell  
294 wall metabolism and photosynthesis (Ju et al., 2015; Van de Poel et al., 2016).

295 In land plants, ABA is associated with a range of developmental and physiological traits  
296 that are central to embryophyte life cycles, and with adaptive responses to the stresses and stimuli  
297 inherent in desiccating terrestrial habitats (Lievens et al., 2017; Eklund et al. 2018; Kollist et al.,

298 2019; Kuromori et al., 2018). ABA can be synthesized in a diverse array of organisms via different  
299 biosynthetic routes (Siewers et al., 2006; Bowman et al., 2019). Two of the plant ABA biosynthetic  
300 genes, NCED and ABA2, are not found in *P. margaritaceum* and other selected algal lineages (Fig.  
301 4; Supplementary Fig. 13 and 14). NCED is the rate-limiting enzyme (converting 9-*cis*-  
302 villa/neoxanthin to xanthoxin) and characterizes the plant-specific indirect ABA biosynthetic  
303 pathway (Hauser et al., 2011). The absence of these critical genes suggests that *P. margaritaceum*  
304 and other charophyte algae may employ a direct pathway, via farnesyl-diphosphate for ABA  
305 biosynthesis. This pathway has been identified in fungi (Siewers et al., 2006) and the associated  
306 genes are present in both algae and land plants (Supplementary Fig. 15). The land plant ABA  
307 signaling machinery involves several core components, including the ABA receptors PYR1/PYLs,  
308 negative regulators PP2C phosphatases and positive regulators SNRK2 kinases and AREB type  
309 bZIP TFs (Hauser et al., 2011). A homolog of PYR1/PYLs was not found in any of the algal  
310 genomes examined (Supplementary Fig. 16; Supplementary Table 9), nor in the transcriptomes of  
311 15 Desmidiaceae genera, and was only present in two out of 13 genera of Zygnematales based on  
312 the transcriptome data (Ju et al., 2015; de Vries et al., 2018; Leebens-Mack et al., 2019), which is  
313 not congruent with the proposal that PYL arose in the common ancestor of the Zygnematophyceae  
314 and land plants (de Vries et al., 2018). Nonetheless, other potential non-canonical ABA receptors  
315 in *A. thaliana*, such as ABAR and GCR (Cutler et al., 2010) were found in the algal genomes  
316 (Supplementary Fig. 17 and 18). Group A PP2C, group II and III SNRK2 and AREBs signaling  
317 components are all present in low copy numbers in *K. nitens* (Hori et al., 2014), *C. braunii*  
318 (Nishiyama et al., 2018), and *P. margaritaceum* (Supplementary Fig. 19-21; Supplementary Table  
319 9), and an SNRK2 from *K. nitens* has been shown to transduce ABA-dependent signals when  
320 expressed in *A. thaliana* cells (Lind et al., 2015). This suggests an evolutionary retention by the  
321 first land plants of an ancestral ABA-mediated signaling and transcriptional regulatory module,  
322 which was then coupled via a novel receptor to land plant-specific ABA biosynthetic machinery.

323 The only traces of a land plant-specific SA pathway in *P. margaritaceum* are an  
324 isochorismate synthase (ICS) homolog and TGA TFs; however, there is evidence of more  
325 extensive genetic innovation related to the BR phytohormone. The classical BR steroid hormone  
326 biosynthetic pathway includes DET2 and four members of the CYP85 clade of cytochrome P450  
327 enzymes (Bak et al., 2011). DET2 orthologs are found widely in algae and land plants, but the four  
328 CYP85 enzymes are specific to vascular plants (Supplementary Fig. 22 and 23). BR regulates gene

329 expression and plant development through a receptor kinase-mediated signal transduction pathway  
330 (Kim et al., 2009) and three out of the five kinases, including the BR receptor BRI1 and BAK1,  
331 are only present in land plants (Fig. 4; Supplementary Table 9). However, we found orthologs of  
332 BSK kinases, contrary to a recent report that BSKs were an embryophyte innovation (Li et al.,  
333 2019) (Supplementary Fig. 24), as well as BZR TFs (Supplementary Fig. 25) in *P. margaritaceum*  
334 but not in *K. nitens* or *C. braunii*. This suggests that these important components of the BR  
335 signaling circuitry, which governs cell elongation, interaction with other hormone networks, light  
336 signaling and stress responses in land plants (Sun et al., 2010; Ren et al., 2019), originated in the  
337 Zygnematophyceae.

338

### 339 **Cell walls and the diversification of extracellular structural polymers**

340 The colonization of terrestrial habitats by embryophytes has been dependent upon the ability to  
341 synthesize complex cell walls that provide biomechanical support and protection against  
342 environmental stresses. Land plant primary walls are comprised of a core scaffolding of cellulose  
343 microfibrils embedded within matrices of interconnecting pectin and hemicellulose  
344 polysaccharides, together with glycoproteins (Burton et al., 2010; Popper et al., 2011; Dehors et  
345 al., 2019). However, immunological and biochemical studies suggest that the capacity to  
346 synthesize many of the polysaccharides of extant embryophyte walls evolved prior to the ancestral  
347 land plant, during divergence of the charophyte algae (Sørensen et al., 2011). Consistent with this  
348 idea, among the most remarkable examples of gene families showing expansion in *P.*  
349 *margaritaceum* are those encoding carbohydrate active enzymes (CAZymes; Cantarel et al., 2009)  
350 of the glycosyl hydrolase (GH), glycosyl transferase (GT), carbohydrate esterase (CE) and  
351 polysaccharide lyase (PL) classes, as well as carbohydrate binding modules (CBMs) and auxiliary  
352 activities (AAs) (Fig. 5A; Supplementary Table 10). CAZy enzymes are involved in diverse  
353 aspects of carbohydrate chemistry, including intracellular glycoconjugates, but notably include  
354 many that may be functionally associated with cell walls. There are relatively few, or in the case  
355 of PLs no, such genes in chlorophytes, and in every case there is a striking increase in abundance  
356 in *P. margaritaceum* compared with *C. braunii*. Moreover, in the cases of GTs and PLs there are  
357 more than in any of the green plant lineages. The large sizes of the classes typically reflect  
358 expansion within individual gene families (Fig. 5A).

359 It might be expected that land plants with more complex body plans would have more  
360 extensive repertoires of CAZy proteins that orchestrate the restructuring of cell wall architecture  
361 during cell expansion and differentiation. However, *P. margaritaceum* has multiple families,  
362 associated with a range of cell wall polysaccharide substrates, which are considerably larger than  
363 those of *A. thaliana*. Particularly prominent examples of such gene family expansions are  
364 annotated as pectinases, such as the GH28 (polygalacturonase; 96 in *P. margaritaceum*, 67 in *A.*  
365 *thaliana*) and PL1 (pectate lyase; 139, 26) families, and GH16 (comprising xyloglucan  
366 transglycosylase/hydrolase, XTH, and endo-glucanase 16, EG16; 41, 33) enzymes. The expansin  
367 family of cell wall loosening proteins (Cosgrove, 2015), which is not included in the CAZy  
368 grouping, show a similar trend (53, 35; Supplementary Table 11). Given that *P. margaritaceum* is  
369 unicellular, the particularly large size of these protein families is not explained by heterogeneity  
370 in wall architecture associated with different cell types or body plan complexity. Rather, it may  
371 reflect duplication and neofunctionalization resulting in differences in enzyme activities and  
372 properties, or in micro/nano-scale differences in spatial distribution.

373 Additionally, the high-level grouping of members in CAZy gene families can mask the  
374 emergence of novel enzymatic activities within distinct subgroups. Indeed, many GH and PL  
375 families are known to be “polyspecific”, encompassing several related, yet distinct, substrate  
376 specificities (Lombard et al., 2010; Viborg et al., 2019). GH16 is one such family, in which a  
377 unique subfamily of mixed-function plant endo-glucanases (comprising clades EG16 and EG16-  
378 2) has recently been delineated as a sister group to the XTHs (Elköf et al., 2013; McGregor et al.,  
379 2017; Behar et al., 2018). The presence of EG16-2 homologs in *P. margaritaceum* (12 genes) and  
380 in *K. nitens* (six genes; Fig. 5B; Supplementary Fig. 26), is concordant with the early evolution of  
381 this endo-glucanase subfamily (Behar et al., 2018), while the *P. margaritaceum* GH16 family  
382 composition suggests that XTHs originated in the Zygnematophyceae. The expansion of EG16  
383 homologs in charophyte lineages is also striking because they are found exclusively as single genes  
384 in the later-diverging land plants (Fig. 5B; Behar et al., 2018). The complexity of GH16 family  
385 expansion and contraction is evident, but its functional significance will require elucidation by  
386 enzymology and structural biology data.

387 Another critical innovation for terrestrial plant life has been the elaboration of specific cell  
388 wall types with other classes of structural polymers to provide additional biophysical attributes for  
389 structural support and barrier properties. Examples include the phenylpropanoid polymer lignin in

390 xylem vessel walls and the deposition of the structurally related lipid polyesters, cutin and suberin,  
391 in the hydrophobic cuticle of epidermal cells and the endodermis of roots, respectively (Fich et al.,  
392 2016; Renault et al., 2019). Algae do not have true cuticles, but a search of the *P. margaritaceum*  
393 genome for homologs of structural and regulatory genes that are known in *A. thaliana* to be  
394 associated with extracellular polyesters and wax cuticle components revealed traces of  
395 biosynthetic, transport and assembly frameworks (Supplementary Table 12). These encode  
396 enzymes involved in intracellular biosynthesis, as well as transporters and extracellular proteins  
397 that have been linked to extracellular lipid trafficking and cuticle assembly (Yeats and Rose, 2013).  
398 For example, homologs of cutin synthase (CUS) and BODYGUARD (BDG), which contribute to  
399 cuticle formation in land plants, are present in *P. margaritaceum* and *K. flaccidum*. However, other  
400 genes that are central to cuticle formation, such as that encoding glycerol-3-phosphate  
401 acyltransferase 6 (GPAT6), which forms monoacylglycerol cutin precursors, are unique to land  
402 plants, or present in far smaller numbers in algae. The quantitative and qualitative changes in  
403 cuticle-associated genes from chlorophytes to charophytes, and then again to land plants,  
404 (Supplementary Table 12), is consistent with the stepwise expansion and neofunctionalization of  
405 ancient core lipid biosynthetic machinery to synthesize structural lipid precursors, in conjunction  
406 with systems for their secretion. There is no evidence in *P. margaritaceum* or other charophytes  
407 of primordial cutin and suberin polyesters, and although wax-like lipid deposits have been reported  
408 in the cell walls of *K. nitens* (Kondo et al., 2016), the assembly of extracellular hydrophobic  
409 polymers was likely a land plant innovation.

410 There are parallels between the origins of cuticles and suberized walls, and the evolution of  
411 lignin, which is deposited in the secondary walls of specific tissues and cell types in land plants to  
412 provide structural reinforcement and protection against pathogens, and to limit water diffusion  
413 (Terrett and Dupree, 2019; Zhong et al., 2019). Lignin is synthesized through the phenylpropanoid  
414 pathway, and while lignin or lignin-like compounds have been reported in non-vascular plants,  
415 including charophytes, some of these likely resulted from misidentification of polyphenols and  
416 true lignin is specific to vascular plants (Weng and Chapple, 2010). The *P. margaritaceum* genome  
417 does not have genes that provide a canonical core phenylpropanoid pathway (Supplementary Table  
418 13), including the enzyme phenylalanine ammonia lyase (PAL) at the entry point, and it has been  
419 suggested that it was acquired in land plants by horizontal gene transfer (Emiliani, et al., 2009).  
420 However, PAL is present in *K. nitens*, but not *C. braunii*, and other core phenylpropanoid

421 biosynthetic genes show a similar ‘patchwork’ distribution among *K. nitens*, *C. braunii* and *P.*  
422 *margaritaceum* (de Vries et al., 2017; Supplementary Table 13). This suggests a complex  
423 evolutionary history in the production of soluble lignin-like compounds in charophytes, some of  
424 which are incorporated into the cell wall (Sørensen et al., 2011; Weng and Chapple, 2010). The  
425 development in charophytes and early land plants of mechanisms to secrete and assemble phenolic  
426 and aliphatic compounds likely gave rise to an increasingly diverse palette of protective  
427 extracellular biopolymers. These in turn paved the way for the formation of lignin, cutin, suberin  
428 and sporopollenin polymers that are found in the walls of extant land plants (Niklas et al., 2017;  
429 Renault et al., 2019).

430 Neo- and subfunctionalization of catalytically promiscuous enzymes, including those in the  
431 ancient shikimate pathway (Niklas et al., 2017), would provide metabolic plasticity, which is  
432 associated with the evolution and functional diversification of phenylpropanoid compounds.  
433 However, the absence in the genome of *P. margaritaceum* and other charophytes of clear  
434 candidates for key steps in the pathway leading to various phenylpropanoid compound classes  
435 suggests the existence of cryptic activities and novel enzymes. A notable example is flavonoids,  
436 which were originally thought to only exist in land plants, but have been identified in a few  
437 divergent algal lineages (Yonekura-Sakakibara et al., 2019). Among other functions, flavonoids  
438 provide protection against UV radiation, which would have been a major challenge for the first  
439 land plants, and so the evolutionary trajectory of flavonoid biosynthesis is of great interest. We  
440 definitively identified multiple classes of flavonoids in *P. margaritaceum* by mass spectrometry  
441 (Supplementary Fig. 27-30), consistent with the presence of biosynthetic routes that are commonly  
442 found in land plants (Supplementary Fig. 31). *P. margaritaceum* has a 4-coumarate:coA ligase  
443 (4CL) and, most notably, 11 homologs of chalcone synthase (CHS), which acts at the entry to  
444 flavonoid biosynthesis and is not present in earlier diverging plant lineages. Paradoxically though,  
445 *P. margaritaceum* has neither PAL nor a cinnamate 4-hydroxylase (C4H) in the same cytochrome  
446 P450 subfamily (CYP73A) as the C4H genes of land plants (Yonekura-Sakakibara et al., 2019)  
447 (Supplementary Table 13). Thus, there is no clear mechanism to synthesize cinnamic acid and  
448 coumaric acid, which are intermediates in the formation of the coumaroyl-CoA substrate for CHS  
449 (Supplementary Fig. 31). Some of the genes functioning downstream of CHS, such as chalcone  
450 isomerase (CHI) and flavanone 3-hydroxylase (F3H), which lead to the spectrum of flavonoid  
451 compounds, are also absent. Whether these apparently missing steps are catalyzed by proteins in

452 the same superfamilies as those of extant land plants, but are more distantly related, or they  
453 represent alternative biosynthetic routes to the same product, remains an open question.

454

#### 455 **Effects of terrestrial abiotic stresses on cellular responses and transcriptome dynamics**

456 To gain further insights into the molecular processes and adaptations that allow *P. margaritaceum*  
457 to tolerate the severe physiological challenges imposed by its ephemeral habitat, we conducted  
458 transcriptome profiling of responses to two archetypal terrestrial environmental factors associated  
459 with a terrestrial habitat: desiccation (DE) and high light (HL), as well as a combination of the two  
460 (HLDE). HL had no notable effect on cellular or chloroplast morphology but DE, imposed by  
461 placing the cells on cellulose sheets, and to a lesser degree HLDE, induced asymmetric cell  
462 elongation and disruption of the characteristic lobed chloroplast architecture. (Fig. 6A). DE and  
463 HLDE treatments also caused substantial accumulation of starch in the chloroplast, as well as the  
464 formation of large cytoplasmic vacuoles, some of which showed evidence of autophagy  
465 (Supplementary Fig. 32). Starch degradation and biosynthesis have both been observed as abiotic  
466 stress responses in different plant taxa (Thalmann and Santelia, 2017), and in land plants,  
467 autophagy is associated with stress tolerance, the recycling of organelles and macromolecules, and  
468 ROS scavenging (Signorelli et al., 2019).

469 A major structural and behavioral effect of all three treatments was the production of large  
470 quantities of mucilage (Fig. 6B). Many zygnematophycean algae secrete large amounts of  
471 extracellular polysaccharide mucilage through their cell walls, creating an extensive hydroscopic  
472 sheath. This material, also referred to as extracellular polymeric substance (EPS), has many  
473 functions that would provide an evolutionary advantage in semi-terrestrial habitats: anti-  
474 desiccation; a matrix for conjugation; a biofilm for communication with other microorganisms;  
475 and a propulsion mechanism where secretion from one pole of the cell allows directional gliding  
476 motility (Boney, 1981; Brook, 1981; Fisher et al., 1998; Oertel et al., 2004; Domozych et al., 2005;  
477 Kiemle et al., 2007; Domozych and Domozych, 2008). Mucilage production, which results in cell  
478 gliding behaviors (Supplementary Video 1 and 2) increased substantially within a few minutes of  
479 applying the HL, DE and HLDE treatments (Fig. 6C,D; Supplementary Fig. 33). Under DE and  
480 HLDE conditions, the EPS trails were more densely packed, leading to cell aggregation. This may  
481 be beneficial to an ephemeral alga whose short active growth period in the summer is defined by  
482 the correlation of high light with drying conditions in shallow wetlands. The tight packing of EPS



483 trails and cells would provide a means of enhancing water retention in a hydroscopic mass under  
484 drying conditions.

485 Consistent with the degree of the morphological and cytological changes, transcriptome  
486 profiling of *P. margaritaceum* revealed a greater response to DE than to the other two treatments  
487 (Fig. 6E; Supplementary Fig. 34), with 9,303 and 10,628 genes up- and down-regulated,  
488 respectively. Most of the DE-related differentially expressed genes (DEGs; 78% of the up-  
489 regulated and 71% of the down-regulated) were DE-specific. HL had the least impact on transcript  
490 profiles, while the combined treatment had an intermediate effect. Under HLDE, 51% and 78% of  
491 the up- and down-regulated genes, respectively, showed the same expression patterns as under the  
492 DE treatment. These results suggest that elevated light levels alleviate the impact of DE stress.

493 Gene ontology (GO) enrichment analysis of the DEGs (Supplementary Table 14-19;  
494 Supplementary Fig. 35) showed that the predominant categories of genes up-regulated by all three  
495 treatments are related to carbohydrate metabolism. The HL treatment caused an induction of genes  
496 related to central carbon metabolism, while photosynthesis related pathways and associated  
497 chloroplast related genes were significantly down-regulated. This is consistent with suppression  
498 of photosynthesis to prevent cellular damage caused by HL-induced ROS, as occurs in land plants  
499 (Rossel et al., 2007). Complex networks of *P. margaritaceum* genes were identified as being  
500 regulated by DE or HL, including representatives of families that are not present in other sequenced  
501 algal genomes. A notable example was GRAS, which corresponded to the TF family with the  
502 greatest number of DEGs under DE (50 and 66 induced and repressed, respectively), while none  
503 was differentially expressed under HL, consistent with an ancestral role in abiotic stress responses.  
504 In addition, 12 of the 15 *P. margaritaceum* DREB TFs (Supplementary Fig. 7), which are also not  
505 found in other algal lineages, were responsive to DE (three up-regulated and nine down-regulated),  
506 consistent with a role in adaptations to increasingly terrestrial habitats

507 One of the most prominent transcriptome responses was a major up-regulation by DE of  
508 genes annotated as being involved in polysaccharide metabolism and cell wall biosynthesis (Fig.  
509 6F; Supplementary Table 14 and 18). These include members of various GT classes, glycan  
510 synthases, and transglycosylases that function in the synthesis of diverse land plant cell wall  
511 polymers, including cellulose, xylan and pectins. It might be expected that the transcriptome  
512 profiles reflect the biosynthesis of the mucilage that was induced in large quantities. An analysis  
513 of the polysaccharides in the mucilage secreted following HL or DE treatments (Supplementary

514 Table 20 and 21) revealed that they are quite distinct from those of the *P. margaritaceum* cell wall  
515 (Sørensen et al., 2011), as well as showing compositional differences in response to different  
516 treatments, and so these gene sets may provide useful targets for future studies of the biosynthesis  
517 and function of the mucilage polymers.

518 The transcriptome profiles also suggested that substantial cell wall remodeling occurred in  
519 response to DE. Large proportions of several of the families associated with cell wall loosening  
520 and degradation (48%, 77%, 68% and 58% of GH28, PL, GH16, and expansin genes, respectively)  
521 were up-regulated in DE stressed cells. Notably, only 1-3% and 6-23% of genes in these families  
522 were up-regulated under HL or HLDE treatment, again suggesting that the effects of DE were  
523 offset by higher light conditions. Congruent with the upregulation of GH28 and PL pectinase genes,  
524 immunological analysis with a monoclonal antibody (JIM5) that recognizes the pectin polymer  
525 homogalacturonan (HG), showed that the application of DE or HLDE stress caused major changes  
526 in the pectin architecture at the site of wall expansion at the isthmus zone (Supplementary Fig.  
527 36A). This was confirmed by ultrastructural observations whereby the HG lattice was significantly  
528 reduced, leaving the inner cellulosic wall layer (Supplementary Fig. 36B,C). This alteration most  
529 likely compromises the structural integrity of the wall, resulting in the unusual shapes of cells  
530 grown under these stress conditions. These results add to growing evidence that abiotic stresses,  
531 such as desiccation, cause remodeling of the cell wall in both charophytes (Herburger and  
532 Holzinger, 2015; Holzinger and Pichrtova, 2016) and land plants (Tenhaken, 2015). The major  
533 expansion of cell wall modifying protein families in *P. margaritaceum*, together with their  
534 upregulation and turnover of their substrates in response to desiccation, highlights the importance  
535 of a dynamic primary cell wall to withstand changing osmotic conditions, and the significance of  
536 habitats such as transient wetlands in land plant evolution.

537

## 538 **DISCUSSION**

539 Approximately 500 Mya, an ancestor of the modern day Zygnematophyceae emerged from a  
540 transient freshwater habitat and colonized a barren terrestrial surface. Subsequent evolutionary  
541 “tuning” gave rise to the great diversity of land plants that has ultimately transformed the natural  
542 history and biogeochemistry of the planet. The *P. margaritaceum* genome sequence confirms the  
543 Zygnematophyceae as the sister lineage of land plants, and has the hallmarks of a dynamic source  
544 of genetic innovation, with abundant TEs and the emergence, or major expansion, of gene families

545 and regulatory systems that are associated with terrestrialization. These include a large  
546 compendium of regulatory TF families and components of phytohormone signaling networks that  
547 govern stress responses and cell morphology in embryophytes.

548 The genome also provides evidence that several key land plant characteristics found in *P.*  
549 *margaritaceum* may have been critical pre-adaptations for the successful transition to life in a  
550 terrestrial habitat. Key among these are an extensive machinery for the synthesis, secretion and  
551 remodeling of the polysaccharide cell wall, much of which originated prior to the first true land  
552 plant. This is exemplified by the substantially expanded repertoire of genes involved in the  
553 metabolism of pectins. These apparently ancient macromolecules contribute to cell expansion and  
554 cell differentiation, as well as forming the middle lamella that mediates intercellular adhesions,  
555 allowing tissue and organ formation in land plants (Zamil and Geitmann, 2017; Cosgrove, 2014).  
556 Additionally, while most terrestrial plant life requires more extensive deposition of hydrophobic  
557 biopolymers to reinforce the walls of specialized cells, the origins of their building blocks can  
558 increasingly be traced back to aquatic ancestors.

559 The unicellular habit of *P. margaritaceum* represents a major evolutionary reduction that  
560 affords significant advantages to life in aquatic habitats that experience periodic drying. Small size,  
561 rapid cell division, simple conjugation-based sexual reproduction and the ability to withstand  
562 desiccation-based stress, and the synthetic machinery to secrete large amounts of water-retaining  
563 mucilage, provide a more efficient means to survive in shallow wetlands than the multicellular  
564 habits and complex reproductive strategies displayed by other late-divergent charophytes. Ancient  
565 zygmatophyceae algae living in isolated freshwater pools were well adapted to make the move  
566 to life on land. It is important to note that all zygmatophyceae taxa are believed to be derived  
567 from multicellular ancestors (Delwiche and Cooper, 2015). Upon initial land colonization, a  
568 reversion to a multicellular form that would provide a greater surface area for photosynthesis and  
569 the absorption of minerals and water from the “new” substrate most likely occurred.

570 More elaborate plant body plans evolved independently in different lineages of the  
571 Streptophyta, with members of the Charophyceae taking advantage of the buoyancy provided by  
572 their exclusively aquatic environment and the Coleochaetophyceae using a highly compact thallus  
573 and unique sensory hairs to live in semi-aquatic and terrestrial habitats. However, it was the  
574 Zygnematophyceae that evolved significant thallus reduction, fast growth rates and simplified  
575 conjugation-based sexual reproduction, to thrive in transient freshwater wetlands that most likely

576 dominated Earth's land surfaces over 500 Mya. As important, these and other characteristics  
577 described in this study were critical to successfully colonizing land. Once established, proliferation  
578 and subsequent evolutionary events led to the land plants.

## 579 MATERIALS AND METHODS

### 580 General culture conditions

581 *Penium margaritaceum* Brébisson (Skidmore College Algal Culture Collection) was maintained  
582 in sterile 100 mL liquid cultures of Woods Hole medium (Nichols, 1973) supplemented with soil  
583 extract (WH soil or WHS: soil extract obtained from Carolina Biological, USA), pH 7.2 at  $18 \pm$   
584  $2^{\circ}\text{C}$  in a photoperiod of 16 h light/8 h dark with  $74 \mu\text{mol photons m}^{-2} \text{s}^{-1}$  Photosynthetic Photon  
585 Flux of cool white fluorescent light. Subcultures were made every 10 days and 10-14 day old  
586 cultures were used for all experiments.

587

### 588 Stress conditions

589 Stress cultures were maintained in 50 mL aliquots of WHS in sterile 150 x 15 mm plastic Petri  
590 dishes. Cultures ( $5 \text{ mL}$ ;  $2,000 \text{ cells mL}^{-1}$ ) were added to each dish, which was then sealed with  
591 surgical tape and placed under high light (HL;  $150 \mu\text{mol photons m}^{-2} \text{s}^{-1}$ ,  $18 \pm 2^{\circ}\text{C}$ ), or control ( $74$   
592  $\mu\text{mol photons m}^{-2} \text{s}^{-1}$ ,  $18 \pm 2^{\circ}\text{C}$ ) conditions. For the desiccation (DE) stress experiments, 150 x 15  
593 mm plastic Petri dishes were filled with 50 mL of WHS containing 2% agarose (Sigma. A-1296)  
594 and allowed to cool. Two sterile 80 mm diameter cellulose sheets (325p; AA Packaging Limited)  
595 were added to each plate and 1 mL of concentrated cell culture ( $\sim 5,000 \text{ cells mL}^{-1}$ ) was spread  
596 onto the sheets. The plates were then sealed and placed under control conditions or HL to produce  
597 high light plus desiccation (HLDE) conditions. Cells from three independent treatments or the  
598 control were collected after 14 days by centrifugation at  $1,500 \times g$  for 1 min, the pellets washed  
599 three times by resuspension in sterile WHS, shaking and centrifugation, and then frozen in liquid  
600 nitrogen. For DE experiments, the cells were scraped off the cellulose sheets and frozen in liquid  
601 nitrogen.

602

### 603 Cell labeling and imaging

604 Cells grown in liquid culture under control or stress conditions were washed three times with WHS,  
605 centrifuged ( $400 \times g$  for 1 min) and the cell pellet was gently resuspended in WHS ( $1,000 \text{ cells}$   
606  $\text{mL}^{-1} \pm 50$ ). Samples ( $200 \mu\text{L}$ ) were placed in the center of a single-welled  
607 polytetrafluoroethylene printed slide (Electron Microscopy Sciences, Hatfield, PA, USA) and  
608 mixed with  $50 \mu\text{L}$  of a  $100 \mu\text{g/mL}$  solution of Fluoresbrite Plain YG  $0.5 \mu\text{m}$  Microspheres, or with  
609  $0.5 \mu\text{m}$  Polybead Polystyrene Microspheres (Polysciences, Warrington, PA, USA). The mixed

610 suspensions were covered with a 22 x 22 mm glass coverslip and imaged with either light  
611 microscopy (LM; Olympus BX-60 or IX-83 equipped with both wide field fluorescence and  
612 differential interference contrast optics), or confocal laser scanning microscopy (CLSM; Olympus  
613 Fluoview 1200 CLSM). Single images or Free Run time lapse video clips were acquired with  
614 Olympus DP-73 cameras. For some experiments, the slides were placed in a moisture chamber  
615 comprising a glass Petri dish with a layer of wet filter paper. The chambers were placed under the  
616 control and HL conditions for various periods of time and then viewed with LM or CLSM. To  
617 image the mucilage in DE cultures, cell aggregates were removed from the surface of desiccation  
618 cultures, placed on the slides as above and a drop of 0.5 mg/mL Fluoresbrite bead solution was  
619 placed on the cell aggregate. The coverslip was then added and the slide viewed with LM or CLSM.  
620 To visualize starch, cell pellets were resuspended in growth medium and stained for 5 min with 1%  
621 v/v iodine then washed before imaging. Immunolabeling of cell wall pectin followed the protocol  
622 of Rydahl et al. (2015) with the anti-HG monoclonal antibody, JIM5 (Knox et al., 1990).  
623 Immunolabeling of the mucilage (EPS) (Fig. 1D) was as described in Domozych et al. (2005).

624 For transmission electron micrograph (TEM) imaging, cell suspensions were spray frozen  
625 into liquid propane cooled with liquid nitrogen. Freeze substitution and embedding followed the  
626 protocol of Domozych et al. (2007) and 80 nm sections were cut on an ultramicrotome (Leica),  
627 stained with conventional uranyl acetate and lead citrate and viewed with a Zeiss Libra 120  
628 transmission electron microscope. For scanning electron microscopy imaging (SEM), cells were  
629 collected by centrifugation, placed on nitrocellulose paper attached to a JEOL Cryostub (JEOL,  
630 USA) and frozen in liquid nitrogen then imaged with a JEOL 6480 LV SEM under low vacuum  
631 conditions (10 kv, spot size 30).

632

### 633 **DNA and RNA extraction**

634 Cells were grown for 14 days in sterile 125 mL flasks containing 75 mL of WHS under the  
635 conditions described above. Cells were then collected by centrifugation, and used as a source of  
636 RNA (Wan and Wilkins, 1994). The quality was confirmed using an Agilent BioAnalyzer (Agilent,  
637 Santa Clara, CA, USA). RNA for ISO-seq was extracted from cells grown for 3 days in mating  
638 inducing media (Sørensen et al., 2014) using the RNeasy Mini kit (Qiagen, USA). Nuclei were  
639 isolated from the cell pellets (Raimundo et al., 2018) and used as a source of genomic DNA as this  
640 yielded far better quality preparations. DNA quality was verified using a Nanodrop™ 2000

641 Spectrophotometer (Thermo Fisher Scientific, USA) and an Agilent BioAnalyzer (Agilent, Santa  
642 Clara, CA, USA).

643

#### 644 **Library construction and sequencing**

645 Five paired-end libraries were constructed for genome sequencing, of which three were prepared  
646 with the Illumina TruSeq DNA PCR-Free Prep kit, one with the Illumina Genomic DNA Sample  
647 Prep kit and one with the Kapa Hyper kit (Kapa Biosystem, Roche). Three mate-pair libraries were  
648 constructed using Illumina Nextera Mate Pair Library Prep kit with insert sizes ranging between  
649 2-4 kb, 5-7 kb and 8-10 kb, respectively (Supplementary Table 1). All libraries were sequenced on  
650 an Illumina HiSeq 2500 system in paired-end mode.

651 Strand-specific RNA-Seq libraries were constructed for each sample as previously described  
652 (Zhong et al., 2011) and sequenced on an Illumina HiSeq 2500 system in paired-end mode. A non-  
653 size-selected SMRTbell (Pacific Biosciences, USA) library from the total RNA was constructed  
654 using the manufacturer's Iso-Seq protocol and sequenced in two SMRT cells on the PacBio Sequel  
655 platform (v2.0 chemistry).

656

#### 657 **Sequence processing, *de novo* assembly and quality evaluation**

658 Genomic paired-end reads were processed to remove adaptors and low-quality bases using  
659 Trimmomatic (Bolger et al., 2014) (version 0.32) with parameters "TruSeq3-PE-  
660 2.fa:2:30:10:1:TRUE SLIDINGWINDOW:4:20 LEADING:3 TRAILING:3 MINLEN:40". Mate-  
661 pair reads were cleaned with the ShortRead package (Morgan et al., 2009) to remove the junction  
662 adaptor sequences formed during library construction and the trailing bases.

663 To assemble the genome, we first searched for optimal k-mer size. Since the *P.*  
664 *margaritaceum* genome is highly repetitive (Supplementary Fig. 1A), large k-mer size can help  
665 resolve repetitive regions with a trade-off of increasing the number of unique k-mers, which  
666 requires more computational resources. For *P. margaritaceum* genome assembly, memory  
667 efficiency was a major bottleneck for most of the popular assemblers attempted, including  
668 MaSuRCA (Zimin et al., 2013), SPAdes (Bankevich et al., 2012), ALLPATHS-LG (Gnerre et al.  
669 2011), ABYSS 2.0 (Jackman et al., 2017) and w2rap-contigger (Clavijo et al. 2017). All of them  
670 failed after running days to weeks on a 1Tb memory machine and some even failed on a 3Tb  
671 memory cluster. The final genome assembly was generated by SOAPdenovo2 (Luo et al., 2012)

672 (version 2.04) on a 1Tb memory machine with kmer size set to 127. The redundant contigs were  
673 removed using BLASTn (coverage  $\geq 90\%$  and identity  $\geq 99\%$ ) and the remaining contigs were  
674 assembled into a scaffold using the built-in module of SOAPdenovo2, with reads from all the mate-  
675 pair and paired-end libraries (parameters '-F -u'). Gaps in the resulting scaffolds were filled using  
676 GapFiller v1-10 (Nadalin et al. 2012) with all paired-end reads.

677 Additional steps were taken to improve the contiguity and gene space of the assembly. First,  
678 the genome was also assembled successfully by MEGAHIT v1.1.1-2-g02102e1 (Li et al., 2015)  
679 using discrete k-mer sizes (121, 139, 159, 179, 199, 219, 239 and 249). Although the overall  
680 quality of the MEGAHIT assembly (contig N50: 498bp; scaffold N50: 696 bp) was not better,  
681 some long contigs were used for further scaffolding or gap filling of the SOAPdenovo2 assembly.  
682 MEGAHIT contigs  $> 2$  kb were used in a BLAST search against the SOAPdenovo2 assembly  
683 (identity  $> 99\%$ ; minimal HSP length  $> 100$  bp). Gapped scaffolds uniquely spanned by  
684 MEGAHIT sequences were filled, or replaced if they were contained by MEGAHIT sequences.  
685 When one MEGAHIT contig was aligned with two SOAPdenovo2 scaffolds, and the two  
686 alignments in the MEGAHIT contig did not overlap, the SOAPdenovo2 scaffolds were joined with  
687 gaps (100 Ns) if: the anchors 1) were located on each contig at the termini; and 2) were  $\geq 100$   
688 nucleotides. Second, the genome assembly was further polished with assistance of transcriptome  
689 *de novo* assembly. We aligned the transcripts to the genome assembly using GMAP (Wu and  
690 Watanabe 2005) (version 2017-10-12) with parameters "--min-identity=0.95 --max-intronlength-  
691 middle 50000 -L 100000". If a transcript was uniquely mapped onto two scaffolds and the  
692 alignments met the following criteria, the two scaffolds were joined with gaps (100 Ns): a)  
693 individual alignment length  $> 100$  bp; b) total alignments should cover  $> 80\%$  of the transcript;  
694 and c) alignments on the scaffolds should be located within 5 kb of the closest terminus.  
695 Consequently, 3,971 scaffolds (~111 Mb) were successfully connected. Lastly, transcripts not  
696 covered by the SOAPdenovo2 assembly but with solid homologs in the NCBI protein database  
697 were mapped to the MEGAHIT assembly, and the aligned MEGAHIT contigs, if not redundant,  
698 were added to the SOAPdenovo2 assembly.

699 To correct base errors in the assembly, the variants were called with all paired-end reads.  
700 Briefly, cleaned reads were aligned to the assembly using BWA 0.7.15-r1140 (Li and Durbin  
701 2009) and valid alignments (mapping quality  $\geq 40$ ; properly paired) were used for SNP calling by  
702 FreeBayes (v1.2.0) (Garrison and Marth 2012) with parameters "-q 0 -F 0.2 -p 1". The variants



703 were filtered by BCFtools (Narasimhan et al., 2016) using the stringent criteria "QUAL>30 &  
704 TYPE='snp' & AO/DP >0.5 & DP>=30 & DP<=300 & MQM>30 & SAF>1 & SAR>1 & RPR>1  
705 & RPL>1". The resulting high-confidence variants were used for base correction of the assembly.  
706 The assembly was further checked for redundancy as described above. Scaffolds with BLASTn  
707 hits (E-value < 1e-5) from non-eukaryotic organisms were manually examined to exclude  
708 contamination.

709 To assess the quality of the assembled genome, Illumina genomic and RNA-Seq reads were  
710 mapped to the assembly through BWA or HISAT2 (Kim et al., 2015) (v2.1), respectively. K-mer  
711 based analysis were carried out with KAT (Mapleson et al., 2016) (V2.4.1).

712

### 713 **PacBio Iso-Seq and Illumina RNA-Seq data analysis and transcriptome *de novo* assembly**

714 Long reads produced by the PacBio Sequel platform were processed using modules in the  
715 SMRTLink package (v5.1; PacBio), to generate full-length refined consensus isoforms. Circular  
716 consensus sequences (CCSs) were obtained from the 'ccs' module using the parameters "--  
717 minPredictedAccuracy=0.75, MinFullPasses =0 and --minLength=100". CCSs containing poly(A)  
718 signal, 5' and 3' adapters were then identified, and the adapters and poly(A) sequences were  
719 trimmed to create full-length non-chimeric reads (FLNC). The retained FLNC reads were  
720 iteratively classified into clusters to build the consensus sequences, which were then polished by  
721 Quiver (Chin et al., 2013) with the minimum accuracy rate set to 0.99. Base errors in the polished  
722 isoforms were further corrected by Illumina RNA-Seq reads using LoRDEC v0.8 (Salmela and  
723 Rivals, 2014) with kmer length set to 19. The LoRDEC-corrected isoforms were used to  
724 reconstruct the coding regions of the *P. margaritaceum* genome using Cogent v3.5  
725 (<https://github.com/Magdoll/Cogent>). To build gene clusters, all the isoforms were aligned to the  
726 *P. margaritaceum* coding genome (the collection of coding sequences generated by Cogent) by  
727 minimap2 with parameters "-ax splice -uf" (Li, 2018), and the resulting alignments were then  
728 processed by cDNA\_Cupcake ([https://github.com/Magdoll/cDNA\\_Cupcake](https://github.com/Magdoll/cDNA_Cupcake)) to collapse isoforms.

729 Illumina RNA-Seq reads were processed with Trimmomatic (Bolger et al., 2014) to remove  
730 adaptor and low-quality sequences. Reads aligned to the ribosomal RNA database (Quast et al.,  
731 2013) were discarded. The remaining cleaned reads were subjected to Trinity (Grabherr et al.,  
732 2011) for *de novo* assembly with the minimum kmer coverage set to two. To remove redundancy,

733 Trinity assembled contigs were further clustered by iAssembler (Zheng et al., 2011) with a  
734 sequence identity cutoff of 97%.

735

### 736 **Repeat annotation**

737 A species-specific repeat library was built following the advanced repeat library construction  
738 tutorial described in Campbell et al. (2014). Specifically, LTRharvest (Ellinghaus et al., 2008)  
739 (v1.5.9; parameters ‘-minlenltr 100 -maxlenltr 6000 -mindistltr 1500 -maxdistltr 25000 -mintsd 5  
740 -maxtsd 5 -motif tgca -vic 10’) and LTRdigest ([http://genometools.org/tools/gt\\_ltrdigest.html](http://genometools.org/tools/gt_ltrdigest.html))  
741 were used to identify long terminal repeat (LTR) retrotransposons, and MITE-Hunter (Han and  
742 Wessler, 2010) (v11-2011; parameters ‘-n 30’) to identify miniature inverted transposable  
743 elements (MITEs) in the genome assembly. The identified LTRs and MITEs were used to mask  
744 the *P. margaritaceum* genome using RepeatMasker (v4.0.7; [www.repeatmasker.org](http://www.repeatmasker.org)), and the  
745 unmasked genomic sequences were analyzed by RepeatModeler (v1.0.11;  
746 <http://www.repeatmasker.org/RepeatModeler.html>) to identify novel transposable elements (TEs).  
747 All identified repeat sequences were searched against the Swiss-Prot database ([www.uniprot.org/](http://www.uniprot.org/))  
748 using BLASTx with an E-value cutoff of 1e-10, and repeats matching non-TE proteins in the  
749 database were excluded. To annotate the repeats, we used a modified approach similar to that  
750 implemented in the RepeatClassifier module of RepeatModeler. First, we ran the RepeatClassifier  
751 on all identified repeats to get a summary statistic of BLASTx matches against a TE protein dataset  
752 provided by RepeatMasker. Repeats were categorized based on the classification of best hits  
753 (filtered by E-value < 1e-3 and alignment length > 150 nucleotides or 50 residues). The  
754 unclassified repeats were scanned by RepeatMasker with all eukaryotic TEs from the Repbase  
755 database (version 20170127). Best hits, with alignments > 200 nucleotides, were kept for TE  
756 family assignment. Simple repeat annotation was performed with an independent run of the TRF  
757 program (Benson, 1999) (v 4.09; parameters: “2 7 7 80 10 50 2000 -h -f -d -m 1 -l 10”).

758

### 759 **Estimation of LTR retrotransposon insertion time**

760 The long terminal repeat (LTR) sequences of each identified full-length retrotransposon were  
761 aligned with MAFFT (Katoh and Standley, 2013) (v7.313; parameters: “--maxiterate 1000 –  
762 localpair”), and the genetic distance was estimated using the distmat program from the EMBOSS  
763 package (Rice et al., 2000) with the Kimura method. The insertion time (T) of the LTR

764 retrotransposons was calculated according to the formula  $T=K/2r$ , where K is the genetic  
765 distance and r is the nucleotide substitution rate, which was estimated to be  $7.0 \times 10^{-9}$   
766 substitutions per site per year in *A. thaliana* (Ossowski et al., 2010).

767

## 768 **Gene prediction**

769 We predicted protein-coding genes in the *P. margaritaceum* genome using the MAKER-P pipeline  
770 (Cantarel et al., 2008) (v2.31.10), which integrates gene models derived from three sources of  
771 predictions: *ab initio* prediction, protein homology based evidence, and transcript evidence. Three  
772 *ab initio* predictors, GeneMark-ES v3.51 (Lomsadze et al., 2005), SNAP v2006-07-28 (Korf, 2004)  
773 and AUGUSTUS v3.3 (Stanke et al., 2006), were incorporated in the MAKER-P pipeline.  
774 Proteomes of 18 plant species across the Viridiplantae were used to identify protein homology. To  
775 prepare the transcript evidence, RNA-Seq reads were assembled using Trinity v2.6.6 (Grabherr et  
776 al., 2011) under both *de novo* and genome-guided modes. The resulting two assemblies, as well as  
777 an additional source of transcript structures obtained from StringTie 1.3.3b (Pertea et al., 2015),  
778 which used RNA-Seq alignments to the *P. margaritaceum* genome by HISAT2 (Kim et al., 2015)  
779 (v2.1), were supplied to the PASA pipeline v2.2.0 (Haas et al., 2003) to build a comprehensive  
780 transcriptome assembly. Protein-coding regions of the PASA assembly were predicted by  
781 TransDecoder (<https://github.com/TransDecoder/TransDecoder/wiki>) and confirmed through  
782 homology search against the Pfam (Bateman et al., 2004) and Uniref (Suzek et al., 2014) protein  
783 databases, PASA predicted gene structures were used as a training set for AUGUSTUS and also  
784 served as an independent prediction considered by the MAKER-P pipeline. The Trinity assemblies,  
785 combined with 29,220 expressed sequence tags (ESTs) from the NCBI nucleotide database, were  
786 fed to the MAKER-P pipeline as transcript evidence.

787 The final MAKER-P gene models were compared to the Pfam database to exclude those  
788 containing TE-related domains. Genes with expression value RPKM (reads per kilobase of exon  
789 model per million mapped reads)  $\geq 1$  in combined RNA-Seq data or having at least one valid hit  
790 in any knowledge databases (nr/Pfam/InterPro/PANTHER) were classified as high-confidence  
791 genes, whereas the rest of the predicted genes were grouped into a low-confidence gene set.

792

793

794

## 795 **Development of the master gene set**

796 To further improve gene completeness, a master gene set was created by incorporating PacBio  
797 Iso-Seq full-length transcript isoforms and Trinity assembled transcripts into the high-confidence  
798 (HC) gene set. Transcript sequences were subjected to SeqClean  
799 (<https://sourceforge.net/projects/seqclean>) for polyA tail trimming and rRNA sequence removal.  
800 Coding regions of the transcripts were identified by TransDecoder, and only those with coding  
801 sequences > 90 nucleotides were kept. CD-HIT (Fu et al., 2012) was used to cluster the coding  
802 sequences to remove redundancies. Coding sequences of Trinity assembled transcripts were  
803 removed if they shared > 90% identity with Iso-Seq isoforms. The remaining coding sequences  
804 were mapped to the *P. margaritaceum* genome using GMAP with parameters “-n 0 -z sense force”.  
805 According to the alignments, we replaced HC genes predicted from the *P. margaritaceum* genome  
806 with corresponding coding transcripts if all the following criteria were met: a) alignment between  
807 the transcript and the HC gene covered > 80% of the HC coding region; b) the length of coding  
808 sequence of the transcript was at least 1.1 times of that of the HC gene; c) length of the transcript  
809 coding sequence should not exceed 1.5 times of the average length of the top 10 protein homologs  
810 in the GenBank ([www.ncbi.nlm.nih.gov](http://www.ncbi.nlm.nih.gov)) non-redundant (nr) database (to avoid chimeric  
811 transcripts); and d) the transcript was the one that contained longest coding sequence in the locus.

812 Some transcripts did not align to the genome or the alignments were located in intergenic  
813 regions. To identify likely protein-coding genes from among these transcripts, we assessed their  
814 coding potential using CPC (Kong et al., 2007) and discarded those annotated as non-coding  
815 transcripts. We also excluded the remaining transcripts without any protein homologs in  
816 Viridiplantae species, and those whose predicted protein sequences were considered to be too long  
817 ( $\geq 1.5$  times the average length of their homologs) or too short ( $\leq 0.5$  times the average length of  
818 their homologs). In addition, transcripts encoding TE-related Pfam domains were removed. For  
819 the remaining transcripts, we only included the longest transcript for each locus into the master  
820 gene set.

821 To annotate genes in the master list, their protein sequences were compared to the GenBank  
822 nr database, the *A. thaliana* proteome ([www.arabidopsis.org](http://www.arabidopsis.org)) and the UniProt database  
823 ([www.uniprot.org](http://www.uniprot.org)) using BLASTp with an E-value cutoff of  $1e-5$ . The protein sequences were  
824 also compared to the InterPro database using InterProScan (v5.29-68.0) (Jones et al., 2014). Gene  
825 ontology (GO) annotations were obtained using Blast2GO (version 5.2.4) (Gotz et al., 2008) based

826 on the BLASTp results from the GenBank nr database and output from the InterProScan.  
827 Functional descriptions were integrated and assigned to the genes using AHRD (v3.3.3;  
828 <https://github.com/groupschoof/AHRD>). Enzyme Commission (EC) information was acquired  
829 from the Blast2GO analysis. Transcription factors, transcriptional regulators and protein kinases  
830 were identified based on the rules of the iTAK pipeline (v1.7) (Zheng et al., 2016). Pathway  
831 analysis was performed using the online annotation server BlastKOALA (Kanehisa et al., 2016).

832

### 833 **Gene family identification**

834 Homologs of each targeted *A. thaliana* gene with known function were identified using a BLASTP  
835 E-value  $\leq 1e-5$  and reciprocal coverage  $\geq 35\%$ . Protein sequences from *P. margaritaceum* and other  
836 selected species were used in BLAST searches of the *A. thaliana* protein database (E-value  $\leq 1e-5$ ,  
837 coverage of *A. thaliana* genes  $\geq 30\%$ ), and genes with the best hit to the identified homologs or  
838 the original *A. thaliana* genes were identified. Alternatively, some of the gene families were  
839 identified based on a search of functional domains with the "--cut-ga" option, or classified based  
840 on iTAK (Zheng et al., 2016) results (specified in the Supplementary Table 9).

841

### 842 **Carbohydrate-active enzyme (CAZy) family identification**

843 The CAZY families were identified using dbCAN2 (Zhang et al., 2018), and unless indicated the  
844 default thresholds (E-value  $< 1e-15$  and coverage  $> 35\%$ ) were used to delineate each gene family.

845

### 846 **Differential gene expression analysis**

847 Cleaned RNA-Seq reads were used to quantify expression of *P. margaritaceum* master genes in  
848 each sample using Salmon v0.9.1 (quasi mode; -k 31) (Patro et al., 2017). Raw counts were  
849 normalized to FPKM (fragments per kilobase of exon model per million mapped fragments).  
850 Differentially expressed genes (DEGs) between treatment and control samples were identified  
851 using the DESeq2 package (Love et al., 2014). Genes with false discovery rate (FDR)  $< 0.01$  and  
852 fold-change  $> 2$  were considered to be DEGs. GO enrichment analysis of the DEGs was performed  
853 using BiNGO (Maere et al., 2005).

854

855

856

## 857 **Species phylogeny, molecular dating, and gene family evolution analysis**

858 *P. margaritaceum* and thirteen other species representing major lineages in the taxon Viridiplantae  
859 were included for comparative genomics analysis (Supplementary Table 22). The orthogroups  
860 among these species were built by OrthoMCL (Li et al., 2003) (v2.0.9) with parameters “E-value  
861  $< 1e-5$ ; alignment coverage  $> 40\%$ ; inflation value 1.5”. To infer the species phylogeny, we  
862 retrieved sequences from low-copy orthogroups, defined as groups in which gene copies for each  
863 species was  $\leq 3$  and maximum number of species with multi-copy genes, or missing genes, was  
864 one. This yielded a total of 738 orthogroups. Each orthogroup was aligned separately with MAFFT  
865 and gap regions in the alignment were trimmed with trimAL (Capella-Gutiérrez et al., 2009). A  
866 Maximum likelihood phylogeny was inferred by IQ-TREE (Nguyen et al., 2014) (v 1.6.7) with  
867 concatenated alignments and best-fitting model (LG+F+I+G4), as well as 1.000 bootstrap  
868 replicates. Molecular dating was carried out by MCMCTree in the PAML package (Yang, 2007).  
869 The divergence time of Tracheophyta (450.8 - 430.4 Mya) was used as a calibration point  
870 according to Morris et al. (2018). For gene family evolution analysis, we used orthogroups with  
871 genes present in at least one algal species and one land plant (N=8859). Modeling of gene family  
872 size was performed by CAFE (De Bie et al., 2006) (v 4.2) and the gene birth and death rate was  
873 estimated with orthogroups that were conserved in all species.

874

## 875 **Whole genome duplication (WGD) analysis**

876 To explore possible WGD in *P. margaritaceum*, we employed CODEML implemented in the  
877 PAML package (v4.9h) to obtain  $Ks$  (synonymous substitution) distribution of paralogous genes.  
878 Briefly, *P. margaritaceum* genes in each orthogroup were compared pairwise and gene pairs  
879 sharing  $> 98\%$  identity at both nucleotide and protein levels were eliminated. The  $Ks$  distribution  
880 was fitted with a mixture model of Gaussian distribution by the mclust R package (Scrucca et al.,  
881 2016) to identify possible WGD signatures.  $Ks$  with values  $> 2$  were excluded because of  $Ks$   
882 saturation. Identification of optimal number of components (corresponding to possible WGDs) in  
883 mclust is prone to overfitting, so we also used SiZer and SiCon from the R package (Duong et al.,  
884 2008) to distinguish components at a significance level of 0.05.

885

886

887

## 888 **Phylogenetic analyses**

889 Protein sequences of the identified genes were aligned using MAFFT (Katoh and Standley, 2013)  
890 and the Maximum Likelihood tree for each family was constructed by IQ-TREE (Nguyen et al.,  
891 2014) with 1,000 bootstrap replicates. The models used were as specified in the individual tree  
892 figures. Abbreviation for selected species (if present) are as follows: *Ostreococcus tauri* (ota, blue),  
893 *Chlorella variabilis* (cva, blue), *Chlamydomonas reinhardtii* (cre, blue), *Klebsormidium nitens*  
894 (kni, light blue), *Chara braunii* (cbr, light blue), *Penium margaritaceum* (pma, green), *Marchantia*  
895 *polymorpha* (mpo, orange), *Physcomitrella patens* (ppa, orange), *Selaginella moellendorffii* (smo,  
896 pink), *Azolla filiculoides* (afi, pink), *Gnetum montanum* (gmo, pink), *Amborella trichopoda* (atr,  
897 red), *Oryza sativa* (osa, red) and *Arabidopsis thaliana* (ath, red). Branches with bootstrap value  
898 (%) >70 are listed. Orthologs from *P. margaritaceum* and other species were inferred from the  
899 tree.

900

## 901 **GH16 sequence characterization and phylogeny construction**

902 BLASTp was used to search through the genomes of *P. margaritaceum*, *K. nitens* and *C. braunii*  
903 with GH16 queries, including laminarinases, agarases, porphyranases, carrageenases, MLGases,  
904 chitin transglycosylases, EG16s and XTHs (Viborg et al., 2019). The resulting sequences were  
905 analyzed manually and candidates were aligned using SignalP ([www.cbs.dtu.dk/services/SignalP](http://www.cbs.dtu.dk/services/SignalP)),  
906 TargetP ([www.cbs.dtu.dk/services/TargetP](http://www.cbs.dtu.dk/services/TargetP)) and a NCBI conserved domain search  
907 ([www.ncbi.nlm.nih.gov](http://www.ncbi.nlm.nih.gov)). They were also aligned with other GH16 sequences (using MAFFT,  
908 ginsi strategy) and the presence of conserved EG16 and XTH motifs was noted. For the GH16  
909 phylogeny, several representatives of each GH16 group were aligned (MAFFT, ginsi strategy)  
910 with all non-fragment *P. margaritaceum* sequences (n=41), *K. nitens* (n=12) sequences, *C. braunii*  
911 (n=6) sequences and GH7 cellulases (as outgroup) then trimmed. To calculate the tree, RAxML-  
912 HPC2 on XSEDE was used on the CIPRES portal ([www.phylo.org](http://www.phylo.org)), with the JTT amino acid  
913 substitution model, which ran for 360 rapid bootstraps.

914

## 915 **Protein structure modeling**

916 The protein structure of *Arabidopsis* ARF1 (PDB accession no. 4LDX) was used as the template  
917 for structure modeling of *P. margaritaceum* ARF proteins using SWISS-MODEL (Waterhouse et  
918 al., 2018) with default parameters. The target and template sequences were aligned with MAFFT

919 (L-INS-I strategy) and the protein structure was visualized using Chimera (version 1.13.1)  
920 (Pettersen et al., 2014).

921

## 922 **Flavonoid extraction and analysis**

923 Flavonoids were extracted from *P. margaritaceum* cell culture pellets based as in Ye et al. (2015).  
924 Freeze-dried samples were homogenized with a TissueLyser II (Qiagen), extracted overnight at  
925 4°C with 80% methanol then centrifuged at 13,000 x g for 10 min. The supernatant was retained  
926 and the pellet re-extracted with 80% methanol for 1 h and centrifuged as before. The supernatants  
927 were pooled and dried using a speed-vac then reconstituted in 120 µL of solvent (40 µL MeOH +  
928 80 µL H<sub>2</sub>O) prior to analysis by liquid chromatography mass spectrometry using a Thermo  
929 Scientific Vanquish UHPLC system (mobile phase A, water with 0.1% formic acid; mobile phase  
930 B, methanol with 0.1% formic acid), with a Thermo Scientific Hypersil Gold column (2.1 x  
931 150mm, 1.9µm) operating at 45°C with a flow rate of 200 µL min<sup>-1</sup>. Separation of compounds was  
932 carried out with gradient elution profile: 0 min, A:B 99.5:0.5; 1 min, A:B 90:10; 10 min, A:B  
933 70:30, 18 min, A:B 50:50, 22 min, A:B 1:99; total 30 min. The injection volume was 2 µL.

934 MS and MS<sup>n</sup> data were collected with a Thermo Scientific Orbitrap ID-X Tribrid mass  
935 spectrometer. Flavonoids were identified using the automated iterative precursor exclusion method  
936 of the Acquire X workflow (four iterative runs of the the pooled sample). The MS<sup>2</sup> (30 K FWHM  
937 at m/z 200) spectra were collected for precursor ions detected in the survey MS scan within a 1.2  
938 second cycle time. Higher order MS<sup>n</sup> (3-4) (30 K FWHM at m/z 200) spectra were collected only  
939 when the instrument detected the sugar neutral loss based on MS<sup>2</sup> and/or MS<sup>3</sup> data. For flavonoid  
940 quantification, ultra-high resolution MS data (120 K FWHM at m/z 200) was collected. Flavonoid  
941 identification and quantification were carried out using Mass Frontier 8.0 and Compound  
942 Discoverer 3.1 software (Thermo Scientific). Specifically, flavonoids were identified and  
943 annotated searching MS<sup>n</sup> tree raw data files against mzCloud spectra library using Mass Frontier  
944 8.0. The identified list (full or partial MS<sup>n</sup> spectral tree data matching MS<sup>n</sup> spectra of flavonoid  
945 references in the mzCloud library) plus an existing database with 6,549 flavonoid structures were  
946 used for database search in Compound Discoverer 3.1. The putative flavonoids identified by CD  
947 3.1 were further analyzed for structure annotation by the FISH ranking tool (Mass Frontier 8.0).

948

949



950 **Mucilage compositional analysis**

951 Mucilage was isolated as in Domozych et al. (2005), freeze dried and analyzed by the carbohydrate  
952 analytical service of the Complex Carbohydrate Research Center, University of Georgia  
953 ([www.ccrcc.uga.edu/services](http://www.ccrcc.uga.edu/services)).

954

955 **REFERENCES**

- 956 Agarwal, P.K., Gupta, K., Lopato, S. & Agarwal, P. Dehydration responsive element binding  
957 transcription factors and their applications for the engineering of stress tolerance. *J. Exp.*  
958 *Bot.* **68**, 2135-2148 (2017).
- 959 Bak, S. et al. Cytochromes p450. *The arabidopsis book* **9**, e0144-e0144 (2011).
- 960 Bankevich, A. et al. SPAdes: a new genome assembly algorithm and its applications to single-cell  
961 sequencing. *J. Comput. Biol.* **19**, 455-477 (2012).
- 962 Bateman, A. et al. The Pfam protein families database. *Nucleic Acids Res.* **32**, D138-D141 (2004).
- 963 Behar, H., Graham, S.W. & Brumer, H. Comprehensive cross-genome survey and phylogeny of  
964 glycoside hydrolase family 16 members reveals the evolutionary origin of EGE16 and  
965 XTH proteins in plant lineages. *Plant J.* **95**, 1114-1128 (2018).
- 966 Benson, G. Tandem repeats finder: a program to analyze DNA sequences. *Nucleic Acids Res.* **27**,  
967 573-580 (1999).
- 968 Bolger, A.M., Lohse, M. & Usadel, B. Trimmomatic: a flexible trimmer for Illumina sequence  
969 data. *Bioinformatics* **30**, 2114-2120 (2014).
- 970 Bolle, C. The role of GRAS proteins in plant signal transduction and development. *Planta* **218**,  
971 683-692 (2004).
- 972 Boney, A.D. Mucilage: a ubiquitous algal attributer. *Brit. Phyco. J.* **16**, 115-132 (1981).
- 973 Boot, K.J.M., Libbenga, K.R., Hille, S.C., Offringa, R. & van Duijn, B. Polar auxin transport: an  
974 early invention. *J. Exp. Bot.* **63**, 4213-4218 (2012).
- 975 Bowman, J.L., Briginshaw, L.N., Fisher, T.J. & Flores-Sandoval, E. Something ancient and  
976 something neofunctionalized—evolution of land plant hormone signaling pathways. *Curr.*  
977 *Opin. Plant Biol.* **47**, 64-72 (2019).
- 978 Brook, A. The biology of desmids. Berkeley: University of California Press (1981).
- 979 Burton, R. A., Gidley, M. J. & Fincher, G. B. Heterogeneity in the chemistry, structure and  
980 function of plant cell walls. *Nature Chem. Biol.* **6**, 724–732 (2010).
- 981 Campbell, M.S. et al. MAKER-P: a tool kit for the rapid creation, management, and quality control  
982 of plant genome annotations. *Plant Physiol.* **164**, 513-524 (2014).
- 983 Cantarel, B.L. et al. The Carbohydrate-Active EnZymes database (CAZy): an expert resource for  
984 glycogenomics. *Nucl. Acids Res.* **37**, D233-D238 (2009).

- 985 Cantarel, B.L. et al. MAKER: an easy-to-use annotation pipeline designed for emerging model  
986 organism genomes. *Genome research* **18**, 188-196 (2008).
- 987 Capella-Gutiérrez, S., Silla-Martínez, J.M. & Gabaldón, T. trimAl: a tool for automated alignment  
988 trimming in large-scale phylogenetic analyses. *Bioinformatics* **25**, 1972-1973 (2009).
- 989 Catarino, B., Hetherington, A.J., Emms, D.M., Kelly, S. & Dolan, L. The stepwise increase in the  
990 number of transcription factor families in the Precambrian predated the diversification of  
991 plants on land. *Mol. Biol. Evol.* **33**, 2815-2819 (2016).
- 992 Chin, C.-S. et al. Nonhybrid, finished microbial genome assemblies from long-read SMRT  
993 sequencing data. *Nature Methods* **10**, 563 (2013).
- 994 Clavijo, B.J. et al. An improved assembly and annotation of the allohexaploid wheat genome  
995 identifies complete families of agronomic genes and provides genomic evidence for  
996 chromosomal translocations. *Genome Research* **27**, 885-896 (2017).
- 997 Cosgrove, D.J. Re-constructing out models of cellulose and primary cell wall assembly. *Curr.*  
998 *Opin. Plant Biol.* **22**, 122-131 (2014).
- 999 Cosgrove, D.J. Plant expansins: diversity and interactions with plant cell walls. *Curr. Opin. Plant*  
1000 *Biol.* **25**, 162-172 (2015).
- 1001 Cutler, S.R., Rodriguez, P.L., Finkelstein, R.R. & Abrams, S.R. Abscisic acid: emergence of a  
1002 core signaling network. *Annu. Rev. Plant Biol.* **61**, 651-679 (2010).
- 1003 De Bie, T., Cristianini, N., Demuth, J.P. & Hahn, M.W. CAFE: a computational tool for the study  
1004 of gene family evolution. *Bioinformatics* **22**, 1269-1271 (2006).
- 1005 deVries, J., Curtis, B.A., Gould, S.B. & Archibald, J.M. Embryophyte stress signaling evolved in  
1006 algal progenitors of land plants. *Proc. Natl. Acad. Sci. USA.* **115**, E3471-3480 (2018).
- 1007 de Vries, J., de Vries, S., Slamovits, C.H., Rose, L.E. & Archibald, J.M. How embryophytic is the  
1008 biosynthesis of phenylpropanoids and their derivatives in streptophyte algae? *Plant Cell*  
1009 *Physiol.* **58**, 934-945 (2017).
- 1010 Delaux, P.-M. et al. Algal ancestor of land plants was preadapted for symbiosis. *Proc. Natl. Acad.*  
1011 *Sci. USA* **112**, 13390-13395 (2015).
- 1012 Delwiche, C.F. & Cooper, E.D. The evolutionary origin of a terrestrial flora. *Curr. Biol.* **25**, R889-  
1013 R910 (2015).
- 1014 Delwiche, C.F. & Timme, R.E. Plants. *Curr. Biol.* **21**, R417-422 (2011).

- 1015 Dehors, J. et al. Evolution of cell wall polymers in tip-growing land plant gametophytes:  
1016 composition, distribution, functional aspects and their remodeling. *Front. Plant Sci.* **10**,  
1017 441 (2019).
- 1018 Domozych, D.S. & Domozych, C.R. Desmids and biofilms of freshwater wetlands: development  
1019 and microarchitecture. *Microbial Ecol.* **55**, 81-93 (2008).
- 1020 Domozych, D.S., Kort, S., Benton, S. & Yu, T. The extracellular polymeric substance of the green  
1021 alga *Penium margaritaceum* and its role in biofilm formation. *Biofilms* **2**, 129-144 (2005).
- 1022 Domozych, D.S., Serfis, A., Kiemle, S.N. & Gretz, M.R. The structure and function of  
1023 charophycean cell walls. I Pectins of *Penium margaritaceum*. *Protoplasma* **239**, 99-115  
1024 (2007).
- 1025 Domozych, D.S. et al. Pectin metabolism and assembly in the cell wall of the charophyte green  
1026 alga *Penium margaritaceum*. *Plant Physiol.* **165**, 105-118 (2014).
- 1027 Duong, T., Cowling, A., Koch, I. & Wand, M.P. Feature significance for multivariate kernel  
1028 density estimation. *Comput. Stat. Data Anal.* **52**, 4225-4242 (2008).
- 1029 Eklund, D.M. et al. An evolutionarily conserved abscisic acid signaling pathway regulates  
1030 dormancy in the liverwort *Marchantia polymorpha*. *Curr. Biol.* **28**, 36912-36999 (2019).
- 1031 Ellinghaus, D., Kurtz, S. & Willhoeft, U. LTRharvest, an efficient and flexible software for de  
1032 novo detection of LTR retrotransposons. *BMC Bioinformatics* **9**, 18 (2008).
- 1033 Elköf, J.M., Shojania, S., Okon, M., McIntosh, L.P. & Brumer, H. Structure-function analysis of  
1034 a broad specificity *Populus trichocarpa* endo- $\beta$ -glucanase reveals an evolutionary link  
1035 between bacterial licheninases and plant XTH gene products. *J. Biol. Chem.* **288**, 15786-  
1036 15799 (2013).
- 1037 Emiliani, G., Fondi, M., Fani, R., & Gribaldo, S. A horizontal gene transfer at the origin of  
1038 phenylpropanoid metabolism: a key adaptation of plants to land. *Biol. Direct.* **4**, 7 (2009).
- 1039 Engstrom, E.M. Phylogenetic analysis of GRAS proteins from moss, lycophyte and vascular plant  
1040 lineages reveals that GRAS genes arose and underwent substantial diversification in the  
1041 ancestral lineage common to bryophytes and vascular plants. *Plant signaling & behavior*  
1042 **6**, 850-854 (2011).
- 1043 Feist, M., Liu, J. & Tafforeau, P. New insights into Paleozoic charophyte morphology and  
1044 phylogeny. *Am. J. Bot.* **92**, 1152-1160 (2005).

- 1045 Fich, E.A., Segerson, N.A. & Rose, J.K.C. The plant polyester cutin: biosynthesis, structure and  
1046 biological roles. *Ann. Rev. Plant Biol.* **67**, 207-233 (2016).
- 1047 Fisher, M.M., Wilcox, L.W. & Graham, L.E. Molecular characterization of epiphytic bacterial  
1048 communities on charophycean green algae. *Appl. Environ. Microbiol* **64**, 4384-4389  
1049 (1998).
- 1050 Fu, L., Niu, B., Zhu, Z., Wu, S. & Li, W. CD-HIT: accelerated for clustering the next-generation  
1051 sequencing data. *Bioinformatics* **28**, 3150-3152 (2012).
- 1052 Garrison, E. & Marth, G. Haplotype-based variant detection from short-read sequencing. *arXiv*  
1053 *preprint arXiv*, 12073907 (2012).
- 1054 Gnerre, S. et al. High-quality draft assemblies of mammalian genomes from massively parallel  
1055 sequence data. *Proc. Natl. Acad. Sci. USA* **108**, 1513-1518 (2011).
- 1056 Gotz, S. et al. High-throughput functional annotation and data mining with the Blast2GO suite.  
1057 *Nucleic Acids Res.* **36**, 3420-3435 (2008).
- 1058 Grabherr, M.G. et al. Full-length transcriptome assembly from RNA-Seq data without a reference  
1059 genome. *Nat. Biotechnol.* **29**, 644-652 (2011).
- 1060 Haas, B.J. et al. Improving the Arabidopsis genome annotation using maximal transcript alignment  
1061 assemblies. *Nucleic Acids Res.* **31**, 5654-5666 (2003).
- 1062 Han, Y. & Wessler, S.R. MITE-Hunter: a program for discovering miniature inverted-repeat  
1063 transposable elements from genomic sequences. *Nucleic Acids Res.* **38**, e199 (2010).
- 1064 Hauser, F., Waadt, R. & Schroeder, J. I. Evolution of abscisic acid synthesis and signaling  
1065 mechanisms. *Curr. Biol.* **21**, R346-R355 (2011).
- 1066 Herburger, K. & Holzinger, A. Localization and quantification of callose in the streptophyte green  
1067 algae *Zygnema* and *Klebsormidium*: correlation with desiccation tolerance, *Plant Cell Phys.*  
1068 **56**, 2259–2270 (2015).
- 1069 Hernandez-Garcia, J., Briones-Moreno, A., Dumas, R., & Blazquez, M.A. Origin of gibberellin-  
1070 dependent transcriptional regulation by molecular exploitation of a transactivation domain  
1071 in DELLA proteins. *Mol. Biol. Evol.* **36**,: 908-918 (2019).
- 1072 Holzinger, A. & Pichrtova, M. Abiotic stress tolerance of charophyte green algae: new challenges  
1073 for omics techniques. *Front. Plant Sci.* **7**, 678 (2016).

- 1074 Hong, L., Brown, J., Segerson, N., Rose, J.K.C. & Roeder, A.H.K. CUTIN SYNTHASE2  
1075 maintains progressively developing cuticular ridges in *Arabidopsis* sepals. *Mol. Plant* **10**,  
1076 560-574 (2017).
- 1077 Hori, K. et al. *Klebsormidium flaccidum* genome reveals primary factors for plant terrestrial  
1078 adaptation. *Nat Commun* **5**, 3978 (2014).
- 1079 Jackman, S.D. et al. ABySS 2.0: resource-efficient assembly of large genomes using a Bloom filter.  
1080 *Genome research* **27**, 768-777 (2017).
- 1081 Jones, P. et al. InterProScan 5: genome-scale protein function classification. *Bioinformatics* **30**,  
1082 1236-1240 (2014).
- 1083 Ju, C. et al. Conservation of ethylene as a plant hormone over 450 million years of evolution. *Nat*  
1084 *Plants* **1**, 14004 (2015).
- 1085 Kanehisa, M., Sato, Y. & Morishima, K. BlastKOALA and GhostKOALA: KEGG Tools for  
1086 Functional Characterization of Genome and Metagenome Sequences. *J. Mol. Biol.* **428**,  
1087 726-731 (2016).
- 1088 Katoh, K. & Standley, D.M. MAFFT multiple sequence alignment software version 7:  
1089 improvements in performance and usability. *Mol. Biol. Evol.* **30**, 772-780 (2013).
- 1090 Kazmierczak, A. & Rosiak, M. Content of gibberellic acid in apical parts of male and female thalli  
1091 of *Chara tomentosa* in relation to the content of sugars and dry mass. *Biologia Plantarum*  
1092 **43**, 369-372 (2000).
- 1093 Kiemle, S.N., Domozych, D.S. & Gretz, M.R. The extracellular polymeric substances of desmids  
1094 (Conjugatophyceae, Streptophyta): chemistry, structural analyses and implications in  
1095 wetland biofilms. *Phycologia* **46**, 617-627 (2007).
- 1096 Kim, D., Langmead, B. & Salzberg, S.L. HISAT: a fast spliced aligner with low memory  
1097 requirements. *Nature Methods* **12**, 357 (2015).
- 1098 Kim, T.W. et al. Brassinosteroid signal transduction from cell-surface receptor kinases to nuclear  
1099 transcription factors. *Nat Cell Biol* **11**, 1254-1260 (2009).
- 1100 Kiseleva, A.A., Tarachovskaya, E.R., & Shisova, M.F. Biosynthesis of phytohormones in algae.  
1101 *Russ. J. Plant Physiol.* **59**, 595-610 (2012).
- 1102 Knox, J.P., Linstead, P.J., King, J. Cooper, C. & Roberts, K. Pectin esterification is spatially  
1103 regulated both within cell walls. *Planta*, **181**, 512-521 (1990).

- 1104 Kollist, H. et al. Rapid responses to abiotic stress: priming the landscape for the signal transduction  
1105 network. *Trends Plant Sci.* **24**, 25-37 (2019).
- 1106 Kondo, S. et al. Primitive extracellular lipid components on the surface of the charophytic alga  
1107 *Klebsormidium flaccidum* and their possible biosynthetic pathways as deduced from the  
1108 genome sequence. *Frontiers Plant Sci.* **7**, 952 (2016).
- 1109 Kong, L. et al. CPC: assess the protein-coding potential of transcripts using sequence features and  
1110 support vector machine. *Nucleic Acids Res.* **35**, W345-349 (2007).
- 1111 Korf, I. Gene finding in novel genomes. *BMC Bioinformatics* **5**, 59 (2004).
- 1112 Kurakawa, T. et al. Direct control of shoot meristem activity by a cytokinin-activating enzyme.  
1113 *Nature* **445**, 652 (2007).
- 1114 Kuromori, T., Seo, M. & Shinozaki, K. ABA transport and plant water stress responses. *Trends*  
1115 *Plant Sci.* **23**, 513-522 (2018).
- 1116 Lang, D. et al. Genome-wide phylogenetic comparative analysis of plant transcriptional regulation:  
1117 a timeline of loss, gain, expansion, and correlation with complexity. *Genome Biol Evol* **2**,  
1118 488-503 (2010).
- 1119 Lashbrooke, J. et al. MYB17 and MYB9 homologs regulate suberin deposition in angiosperms.  
1120 *Plant Cell* **28**, 2097-2116 (2016).
- 1121 Lee, S.B. & Suh, M.C. Advances in the understanding of cuticular waxes in *Arabidopsis thaliana*  
1122 and crop species. *Plant Cell Reports* **34**, 557-572 (2015).
- 1123 Leebens-Mack, J.H. et al. One thousand plant transcriptomes and the phylogenomics of green  
1124 plants. *Nature*, doi:10.1038/s41586-019-1693-2 (2019).
- 1125 Leyser, O. Auxin signaling. *Plant Physiol.* **176**, 465-479 (2018).
- 1126 Li, D., Liu, C.M., Luo, R., Sadakane, K. & Lam, T.W. MEGAHIT: an ultra-fast single-node  
1127 solution for large and complex metagenomics assembly via succinct de Bruijn graph.  
1128 *Bioinformatics* **31**, 1674-1676 (2015).
- 1129 Li, H. Minimap2: pairwise alignment for nucleotide sequences. *Bioinformatics* **34**, 3094-3100  
1130 (2018).
- 1131 Li, H. & Durbin, R. Fast and accurate short read alignment with Burrows-Wheeler transform.  
1132 *Bioinformatics* **25**, 1754-1760 (2009).
- 1133 Li, L., Stoeckert, C.J. & Roos, D.S. OrthoMCL: identification of ortholog groups for eukaryotic  
1134 genomes. *Genome Res* **13**, 2178-2189 (2003).

- 1135 Li, Z., Shen, J., & Liang, J. Genome-wide identification, expression profile, and alternative  
1136 splicing analysis of the brassinosteroid-signaling kinase (BSK) family genes in  
1137 *Arabidopsis*. *Int. J. Mol. Sci.* **20**, 1138 (2019).
- 1138 Lievens, L., Pollier, J., Goeseens, A., Beyaert, R., & Staal, J. Abscisic acid as pathogen effector  
1139 and immune regulator. *Frontiers Plant Sci.* **8**, 587 (2017).
- 1140 Lind, C. et al. Stomatal guard cells co-opted an ancient ABA-dependent desiccation survival  
1141 system to regulate stomatal closure. *Curr. Biol.* **25**, 928-935 (2015).
- 1142 Lombard, V. et al. A hierarchical classification of polysaccharide lyases for glycomics.  
1143 *Biochem. J.* **432**, 437-444 (2010).
- 1144 Lomsadze, A., Ter-Hovhannisyanyan, V., Chernoff, Y.O. & Borodovsky, M. Gene identification in  
1145 novel eukaryotic genomes by self-training algorithm. *Nucleic acids res.* **33**, 6494-6506  
1146 (2005).
- 1147 Love, M.I., Huber, W. & Anders, S. Moderated estimation of fold change and dispersion for RNA-  
1148 seq data with DESeq2. *Genome Biol* **15**, 550 (2014).
- 1149 Lu, Y. & Xu, J. Phytohormones in microalgae: a new opportunity for microalgal biotechnology?  
1150 *Trends Plant Sci.* **20**, 273-282 (2015).
- 1151 Luo, R. et al. SOAPdenovo2: an empirically improved memory-efficient short-read de novo  
1152 assembler. *Gigascience* **1**, 18 (2012).
- 1153 Ma, H.S. Liang, D. Shuai, P. Xia, X.L. & Yin, W.L. The salt- and drought-inducible poplar GRAS  
1154 protein SCL7 confers salt and drought tolerance in *Arabidopsis thaliana*. *J. Exp. Bot.* **61**,  
1155 4011-4019 (2010).
- 1156 Maere, S., Heymans, K. & Kuiper, M. BiNGO: a Cytoscape plugin to assess overrepresentation of  
1157 gene ontology categories in biological networks. *Bioinformatics* **21**, 3448-3449 (2005).
- 1158 Mapleson, D., Garcia Accinelli, G., Kettleborough, G., Wright, J. & Clavijo, B.J. KAT: a K-mer  
1159 analysis toolkit to quality control NGS datasets and genome assemblies. *Bioinformatics* **33**,  
1160 574-576 (2016).
- 1161 Martin-Arevalillo, R. et al. Evolution of the auxin response factors from charophyte ancestors.  
1162 *PLOS Genet* **15**, e1008400 (2019).



- 1163 McGregor, N., Yin, V., Tung, C.C., Van Petergem, F., & Brumer, H. Crystallographic insight into  
1164 the evolutionary origins of xyloglucan endotransglycosylases and endohydrolases. *Plant J.*  
1165 **89**, 651-670 (2017).
- 1166 Morgan, M. et al. ShortRead: a bioconductor package for input, quality assessment and exploration  
1167 of high-throughput sequence data. *Bioinformatics* **25**, 2607 (2009).
- 1168 Morris, J.L. et al. The timescale of early land plant evolution. *Proc. Natl. Acad. Sci. USA* **115**,  
1169 E2274-e2283 (2018).
- 1170 Nadalin, F., Vezzi, F. & Policriti, A. GapFiller: a de novo assembly approach to fill the gap within  
1171 paired reads. *BMC Bioinformatics* **13 Suppl 14**, S8 (2012).
- 1172 Narasimhan, V. et al. BCFtools/RoH: a hidden Markov model approach for detecting autozygosity  
1173 from next-generation sequencing data. *Bioinformatics* **32**, 1749-1751 (2016).
- 1174 Nguyen, L.-T., Schmidt, H.A., von Haeseler, A. & Minh, B.Q. IQ-TREE: a fast and effective  
1175 stochastic algorithm for estimating maximum-likelihood phylogenies. *Mol. Biol. Evol.* **32**,  
1176 268-274 (2014).
- 1177 Nichols, H.W. Growth media-freshwater. In: Stein JR, editor. Handbook of phycological methods:  
1178 culture methods and growth measurements. New York: Cambridge University Press; 1973.  
1179 p. 39–78.
- 1180 Niklas, K.J., Cobb, E.D. & Matas, A.J. The evolution of hydrophobic cell wall biopolymers: from  
1181 algae to angiosperms. *J. Exp. Bot.* **68**, 5261-5269 (2017).
- 1182 Nishiyama, T. et al. The *Chara* genome: secondary complexity and implications for plant  
1183 terrestrialization. *Cell* **174**, 448-464.e424 (2018).
- 1184 Oertel, A., Aichinger, N., Hochreiter, R., Thalhammer, J. & Lütz-Meindl, U. Analysis of  
1185 mucilage secretion and excretion in *Micrasterias* (Chlorophyta) by means of  
1186 immunoelectron microscopy and digital time lapse video microscopy. *J. Phycol.* **40**, 711-  
1187 720 (2004).
- 1188 Ohtaka, K., Hori, K., Kanno, Y., Seo, M. & Ohta, H. Primitive auxin response without TIR1 and  
1189 Aux/IAA in the charophyte alga *Klebsormidium nitens*. *Plant Physiol.* **174**, 1621-1632  
1190 (2017).
- 1191 Ossowski, S. et al. The rate and molecular spectrum of spontaneous mutations in *Arabidopsis*  
1192 *thaliana*. *Science* **327**, 92-99 (2010).

- 1193 Panchy, N., Lehti-Shiu, M. & Shiu, S.-H. Evolution of gene duplication in plants. *Plant Physiol.*  
1194 **171**, 2294-2316 (2016).
- 1195 Pascal, S. et al. Arabidopsis CER1-LIKE1 functions in a cuticular very-long-chain alkane-forming  
1196 complex. *Plant Physiol.* **179**, 415-432 (2019).
- 1197 Patro, R., Duggal, G., Love, M.I., Irizarry, R.A. & Kingsford, C. Salmon provides fast and bias-  
1198 aware quantification of transcript expression. *Nature Methods* **14**, 417 (2017).
- 1199 Perteu, M. et al. StringTie enables improved reconstruction of a transcriptome from RNA-seq reads.  
1200 *Nature Biotechnology* **33**, 290 (2015).
- 1201 Pettersen, E.F. et al. UCSF Chimera—a visualization system for exploratory research and analysis.  
1202 *J. Comp. Chem.* **25**, 1605-1612 (2004).
- 1203 Pineau, E. et al. *Arabidopsis thaliana* EPOXIDE HYDROLASE1 (AtEH1) is a cytosolic epoxide  
1204 hydrolase involved in the synthesis of poly-hydroxylated cutin monomers. *New Phytol.*  
1205 **215**, 173-186 (2017).
- 1206 Popper, Z.A. et al. Evolution of diversity of plant cell walls: from algae to flowering plants. *Ann.*  
1207 *Rev. Plant Biol.* **62**, 567-590 (2011).
- 1208 Quast, C. et al. The SILVA ribosomal RNA gene database project: improved data processing and  
1209 web-based tools. *Nucleic Acids Res.* **41**, D590-596 (2013).
- 1210 Raimundo, S.C. et al. Protoplast isolation and manipulation of protoplasts from the unicellular  
1211 green alga *Penium margaritaceum*. *Plant Methods* **14**, 18 (2018).
- 1212 Ren, H. et al. BRASSINOSTEROID-SIGNALING KINASE 3, a plasma membrane-associated  
1213 scaffold protein involved in early brassinosteroid signaling. *PLoS Genet.* **15**, e1007904  
1214 (2019).
- 1215 Renault, H., Werck-Reichhart, D. & Weng, J.-K. Harnessing lignin evolution for biotechnological  
1216 applications. *Curr. Opin. Plant Biotechnol.* **56**, 105-111 (2019).
- 1217 Rensing, S.A. Great moments in evolution: the conquest of land by plants. *Curr. Opin. Plant Biol.*  
1218 **42**, 49-54 (2018).
- 1219 Rice, P., Longden, I. & Bleasby, A. EMBOSS: the European molecular biology open software  
1220 suite. *Trends in genetics* **16**, 276-277 (2000).
- 1221 Romani, F. Origin of TAA genes in Charophytes: New insights into the controversy over the origin  
1222 of auxin biosynthesis. *Frontiers in Plant Science* **8**, 1616 (2017).

- 1223 Rossel, J.B. et al. Systemic and intracellular responses to photooxidative stress in *Arabidopsis*.  
1224 *Plant Cell* **19**, 4091-4110 (2007).
- 1225 Rydahl, M.G. et al. *Penium margaritaceum* as a model organism for cell wall analysis of  
1226 expanding plant cells. In: Estevez, J.M., ed., *Plant Cell Expansion. Methods in Molecular*  
1227 *Biology*. New York, Springer **1242**, 1-21 (2015).
- 1228 Salmela, L. & Rivals, E. LoRDEC: accurate and efficient long read error correction.  
1229 *Bioinformatics* **30**, 3506-3514 (2014).
- 1230 Scrucca, L., Fop, M., Murphy, T.B. & Raftery, A.E. mclust 5: Clustering, Classification and  
1231 Density Estimation Using Gaussian Finite Mixture Models. *The R journal* **8**, 289-317  
1232 (2016).
- 1233 Shanmugarajah, K. et al. ABCG1 contributes to suberin formation in *Arabidopsis thaliana* roots.  
1234 *Scientific Reports* **9**, 11381 (2019).
- 1235 Siewers, V., Kokkelink, L., Smedsgaard, J. & Tudzynski, P. Identification of an abscisic acid gene  
1236 cluster in the grey mold *Botrytis cinerea*. *Appl. environ. microb.* **72**, 4619-4626 (2006).
- 1237 Signorelli, S., Tarkowski, L.P., Van den Ende, W. & Bassham, D.C. Linking autophagy to abiotic  
1238 and biotic stress responses. *Trends Plant Sci.* **24**, 413-430 (2019).
- 1239 Simão, F.A., Waterhouse, R.M., Ioannidis, P., Kriventseva, E.V., Zdobnov, E.M. BUSCO:  
1240 assessing genome assembly and annotation completeness with single-copy orthologs.  
1241 *Bioinformatics* **31**, 3210-3212 (2015).
- 1242 Sørensen, I. et al. Stable transformation and reverse genetic analysis of *Penium margaritaceum*: a  
1243 platform for studies of charophyte green algae, the immediate ancestors of land plants.  
1244 *Plant J.* **77**, 339-351 (2014).
- 1245 Sørensen, I. et al. The charophycean green algae provide insights into the early origins of plant  
1246 cell walls. *Plant J.* **68**, 201–211 (2011).
- 1247 Stanke, M., Tzvetkova, A. & Morgenstern, B. AUGUSTUS at EGASP: using EST, protein and  
1248 genomic alignments for improved gene prediction in the human genome. *Genome Biol* **7**  
1249 **Suppl 1**, S11.1-8 (2006).
- 1250 Swarup, R. & Bennett, M.J. Auxin transport: providing plants with a new scale new sense of  
1251 direction. *Biochem. Soc. Trans.* **36**, 12-16 (2014).
- 1252 Swarup, R. & Bhosale, R. Developmental roles of AUX1/LAX auxin influx carriers in plants.  
1253 *Frontiers Plant Sci.*, <https://doi.org/10.3389/fpls.2019.01306> (2019).

- 1254 Sun, Y. et al. Integration of brassinostroid signal transduction with the transcription network for  
1255 plant growth regulation in *Arabidopsis*. *Dev. Cell* **19**, 765-777 (2010).
- 1256 Suzek, B.E. et al. UniRef clusters: a comprehensive and scalable alternative for improving  
1257 sequence similarity searches. *Bioinformatics* **31**, 926-932 (2014).
- 1258 Tenhaken, R. Cell wall remodeling under abiotic stress. *Frontiers Plant Sci.* **5**, 771 (2015).
- 1259 Terrett, O. & Dupree, P. Covalent interactions between lignin and hemicelluloses in plant  
1260 secondary cell walls. *Curr. Opin. Plant Biotechnol.* **56**, 97-104 (2019).
- 1261 Thalmann, M. & Santelia, D. Starch as a determinant of plant fitness under abiotic stress. *New Phytol.*  
1262 **214**, 943-951 (2017).
- 1263 Tivendale, N.D., Ross, J.J. & Cohen, J.D. The shifting paradigms of auxin biosynthesis. *Trends*  
1264 *Plant Sci.* **19**, 44-51 (2014).
- 1265 Van de Peer, Y., Mizrahi, E. & Marchal, K. The evolutionary significance of polyploidy. *Nat.*  
1266 *Rev. Genet.* **18**, 411-424 (2017).
- 1267 Van de Poel, B., Cooper, E.M., Van der Straeten, D., Chang C. and Delwiche, C.F. Transcriptome  
1268 profiling of the green alga *Spirogyra pratense* (Charophyta) suggests an ancestral role for  
1269 ethylene in cell wall metabolism, photosynthesis and abiotic stress responses. *Plant Physiol.*  
1270 **172**, 533-545 (2016).
- 1271 Viaene, T., Delwiche, C.F., Rensing, S.A. & Friml, J. Origin and evolution of PIN auxin  
1272 transporters in the green lineage. *Trends Plant Sci.* **18**, 5-10 (2012).
- 1273 Viborg, A.H. et al. A subfamily roadmap of the evolutionarily diverse glycoside hydrolase family  
1274 16 (GH16). *J. Biol. Chem.* **294**, 15973-15986 (2019).
- 1275 Vishwanath, S.J., Delude, C., Domergue, F. & Rowland, O. Suberin: biosynthesis, regulation, and  
1276 polymer assembly of a protective extracellular barrier. *Plant Cell Reports* **34**, 573-586  
1277 (2015).
- 1278 Walker, C.H., Siu-Ting, K., Taylore, A., O'Connell, M.J. & Bennett, T. Strigolactone synthesis is  
1279 ancestral in land plants, but canonical strigolactone signalling is a flowering plant  
1280 innovation. *BMC Biol.* **17**, 70 (2019).
- 1281 Wan, C.Y. & Wilkins, T.A. A modified hot borate method significantly enhances the yield of high-  
1282 quality RNA from cotton. *Anal. Biochem.* **223**, 7-12 (1994).
- 1283 Waterhouse, A. et al. SWISS-MODEL: homology modelling of protein structures and complexes.  
1284 *Nucleic Acids Res.* **46**, W296-W303 (2018).

- 1285 Weng, J.-K. and Chapple, C. The origin and evolution of lignin biosynthesis. *New Phytol.* **187**,  
1286 273-285 (2010).
- 1287 Wodniok, S. et al. Origin of land plants: do conjugating green algae hold the key? *BMC Evol. Biol.*  
1288 **11**, 104 (2011).
- 1289 Wu, T.D. & Watanabe, C.K. GMAP: a genomic mapping and alignment program for mRNA and  
1290 EST sequences. *Bioinformatics* **21**, 1859-1875 (2005).
- 1291 Yang, Z. PAML 4: phylogenetic analysis by maximum likelihood. *Mol. Biol. Evol.* **24**, 1586-1591  
1292 (2007).
- 1293 Ye, J. et al. Transcriptome profiling of tomato fruit development reveals transcription factors  
1294 associated with ascorbic acid, carotenoid and flavonoid biosynthesis. *PLOS ONE* **10**,  
1295 e0130885 (2015).
- 1296 Yeats, T.H. & Rose, J.K.C. The formation and function of plant cuticles. *Plant Physiol.* **163**, 5-20  
1297 (2013).
- 1298 Yonekura-Sakakibara, K., Higashi, Y. & Nakabayashi, R. The origin and evolution of plant  
1299 flavonoid metabolism. *Frontiers Plant Sci.* **10**, 943 (2019).
- 1300 Yue, J., Hu, X., Sun, H., Yang, Y. & Huang, J. Widespread impact of horizontal gene transfer on  
1301 plant colonization of land. *Nat Commun* **3**, 1152 (2012).
- 1302 Żabka, A. et al. PIN2-like proteins may contribute to the regulation of morphogenetic processes  
1303 during spermatogenesis in *Chara vulgaris*. *Plant Cell Reports* **35**, 1655-1669 (2016).
- 1304 Zamil, M.S. & Geitmann, A. The niddle lamella- more than a glue. *Phys. Biol.* **14**, 015004 (2017).
- 1305 Zhang, D., Iyer, L.M. & Aravind, L. Bacterial GRAS domain proteins throw new light on  
1306 gibberellic acid response mechanisms. *Bioinformatics* **28**, 2407-2411 (2012).
- 1307 Zhang, H. et al. dbCAN2: a meta server for automated carbohydrate-active enzyme annotation.  
1308 *Nucleic Acids Res.* **46**, W95-W101 (2018).
- 1309 Zheng, Y. et al. iTAK: A program for genome-wide prediction and classification of plant  
1310 transcription factors, transcriptional regulators, and protein kinases. *Mol. Plant* **9**, 1667-  
1311 1670 (2016).
- 1312 Zheng, Y., Zhao, L., Gao, J. & Fei, Z. iAssembler: a package for de novo assembly of Roche-  
1313 454/Sanger transcriptome sequences. *BMC Bioinformatics* **12**, 453 (2011).
- 1314 Zhong, R., Cui, D. & Ye, Z.-H. Secondary cell wall biosynthesis. *New Phytol.* **221**, 1703-1723  
1315 (2019).

- 1316 Zhong, S. et al. High-throughput illumina strand-specific RNA sequencing library preparation.  
1317 *Cold Spring Harb Protoc* **2011**, 940-949 (2011).
- 1318 Zimin, A.V. et al. The MaSuRCA genome assembler. *Bioinformatics* **29**, 2669-2677 (2013).
- 1319
- 1320
- 1321
- 1322
- 1323
- 1324

1325 **ACKNOWLEDGMENTS**

1326 We thank Sandra Raimundo and Stephen Snyder for technical support and the Imaging, Genomics  
1327 and facilities of Cornell's Biotechnology Resource Center, Institute of Biotechnology. J.K.C.R. is  
1328 supported by the Cornell Atkinson Center for Sustainability. The mucilage analysis work was  
1329 supported by the Chemical Sciences, Geosciences and Biosciences Division, Office of Basic  
1330 Energy Sciences, U.S. Department of Energy grant (DE-SC0015662) to Dr. Parastoo Azadi at the  
1331 Complex Carbohydrate Research Center, University of Georgia.

1332

1333 **AUTHOR INFORMATION**

1334 The authors declare no competing interests

1335

1336

1337 **FIGURE LEGENDS**

1338 **Figure 1.** Phylogeny of green plants and morphology of *Penium margaritaceum*. (A) Current  
1339 positioning of charophytes in plant phylogeny, highlighting variation in typical body plans (e.g.  
1340 unicellular, filamentous and complex branched and multicellular) and associated terrestrial or  
1341 aquatic habitats. Lineages for which there is a representative genome sequence are shown with an  
1342 asterisk. (B) Cylindrical *P. margaritaceum* cell consisting of two semi-cells, each with one or two  
1343 chloroplasts. The cell center (isthmus; arrow) contains the nucleus and is the major site of cell  
1344 expansion. (C) Scanning electron micrograph image of a *P. margaritaceum* cell, highlighting the  
1345 complex lattice of cell wall pectin polysaccharides on the cell surface. (D). Confocal scanning  
1346 laser microscopy image of *P. margaritaceum* cells labeled with an antibody to the mucilage that  
1347 encases them. Scale bars: B, 15  $\mu\text{m}$ ; C, 12  $\mu\text{m}$ ; D, 15  $\mu\text{m}$ .

1348  
1349 **Figure 2.** Repeat sequences in genomes of *P. margaritaceum* and selected green plant species. (A)  
1350 Contents of different repeats in different green plant species. The schematic tree on the left shows  
1351 evolutionary relationships. Numbers on the right panel correspond to *DIRS*, *Ngaro*, *copia*, and  
1352 *gypsy* percentages. (B) Estimated insertion time of full-length *copia* and *gypsy* LTRs in the *P.*  
1353 *margaritaceum* genome (band width: 0.4).

1354  
1355 **Figure 3.** Gene family evolution in green plant species. (A) Divergence and gene family evolution  
1356 of selected species. Numbers in bracket indicate the estimated age in million years. Numbers on  
1357 branches represent significantly ( $P < 0.05$ ) expanded (red) or contracted (green) gene families in  
1358 that branch compared to its last ancestor. (B) Transcription factor families expanded compared to  
1359 earlier diverging lineages, or starting to emerge, in *Penium margaritaceum*. (C) Maximum  
1360 likelihood phylogeny of GRAS proteins. The tree on the left includes GRAS proteins from five  
1361 plant species: *P. margaritaceum* (green), *Marchantia polymorpha* and *Physcomitrella patens*  
1362 (orange), and *Arabidopsis thaliana* and *Oryza sativa* (dark red). The collapsed clade (right)  
1363 contains GRAS proteins of *P. margaritaceum* (green branches) and other algae (dark branches)  
1364 based on transcriptome data. Pies indicate branches with bootstrap value  $< 90$ .

1365  
1366 **Figure 4.** Genes involved in phytohormone biosynthesis and signaling. JA, jasmonic acid; GA,  
1367 gibberellins; SL, strigolactone; CK, cytokinin; ETH, ethylene; ABA, abscisic acid (ABA); SA,



1368 salicylic acid; and BR, brassinosteroid. Rectangles, biosynthetic enzymes; hexagons, receptors;  
1369 ovals, signal transduction components; and octagons, transcription factors. Shapes with a border  
1370 indicate genes present in *Penium margaritaceum*. Double asterisks indicate genes that are present  
1371 in *P. margaritaceum*, but not in earlier diverging lineages. The red triangle indicates a proto-  
1372 domain I/II present in *P. margaritaceum* and the red star shows the proto A/B ARFs in *P.*  
1373 *margaritaceum*. Blue shapes indicate genes already present in chlorophytes, and green and pale  
1374 yellow shapes represent genes arising in charophytes and land plants, respectively.

1375  
1376 **Figure 5.** Carbohydrate active enzyme (CAZy) class composition. (A) Number of genes (left y  
1377 axis; bars) and families (right y axis; lines) in the glycosyl hydrolase (GH), glycosyltransferase  
1378 (GT), pectate lyase (PL), carbohydrate esterase (CE), carbohydrate binding module (CBM) and  
1379 ancillary activity (AA) classes. (B) Census of EG16, EG16-2, XTH, and other GH16 homologs in  
1380 the genomes of selected plants.

1381  
1382 **Figure 6. Responses of *Penium margaritaceum* to high light and desiccation stress.** (A)  
1383 Morphology of *P. margaritaceum* cells grown under control, high light (HL), or desiccating (DE)  
1384 conditions, or a combined treatment (HLDE), imaged using differential interference contrast  
1385 microscopy (DIC; left panel of each condition) and fluorescent light microscopy (FLM; right  
1386 panels). (B) DIC (top) and confocal laser scanning microscopy (CLSM) image (bottom) after  
1387 labeling with Fluoresbrite beads, showing mucilage secretion predominating from one pole of the  
1388 cell, resulting in propulsion. (C) Gliding trails in control cells. (D) Dense cellular aggregation  
1389 following HL treatment. (E) Gene expression analysis, based on RNA-seq data, of HL, DE, and  
1390 HLDE treated *P. margaritaceum* cells compared with cells grown under control conditions. (F)  
1391 Word clouds of gene ontology (GO) terms in the ‘biological process’ category related to  
1392 differential gene expression under DE and HLDE conditions.

1393

Figure 1

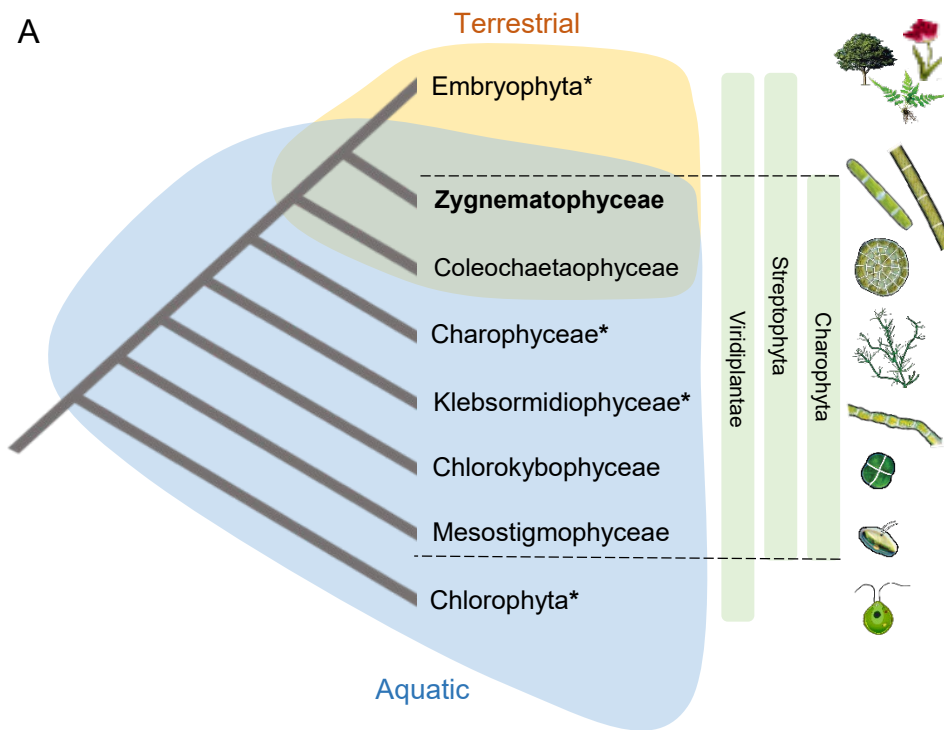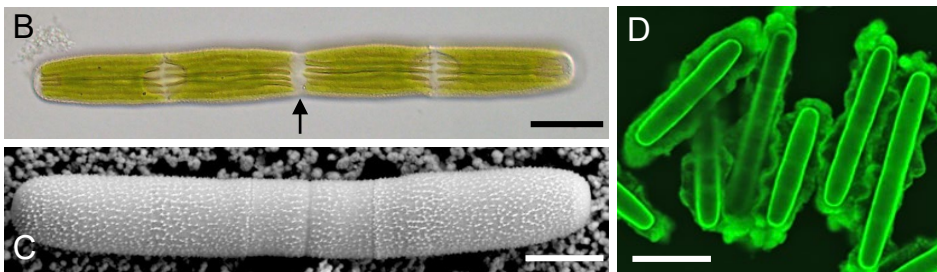

## Figure 2

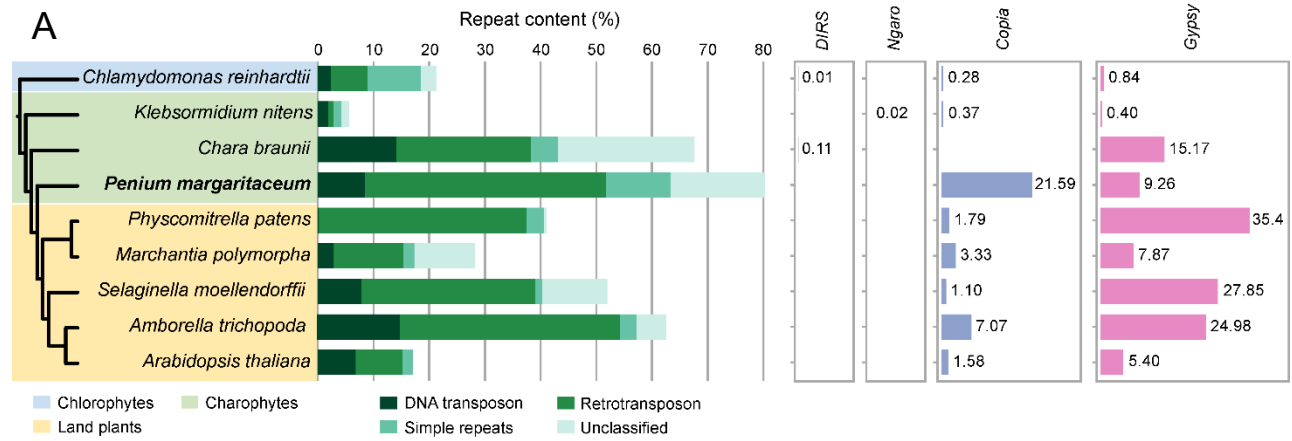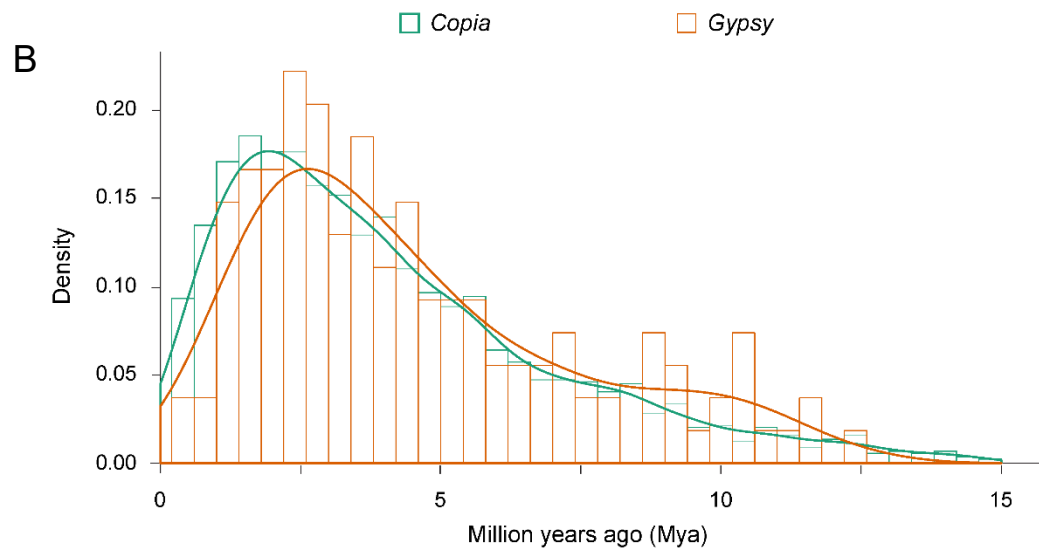

Figure 3

A

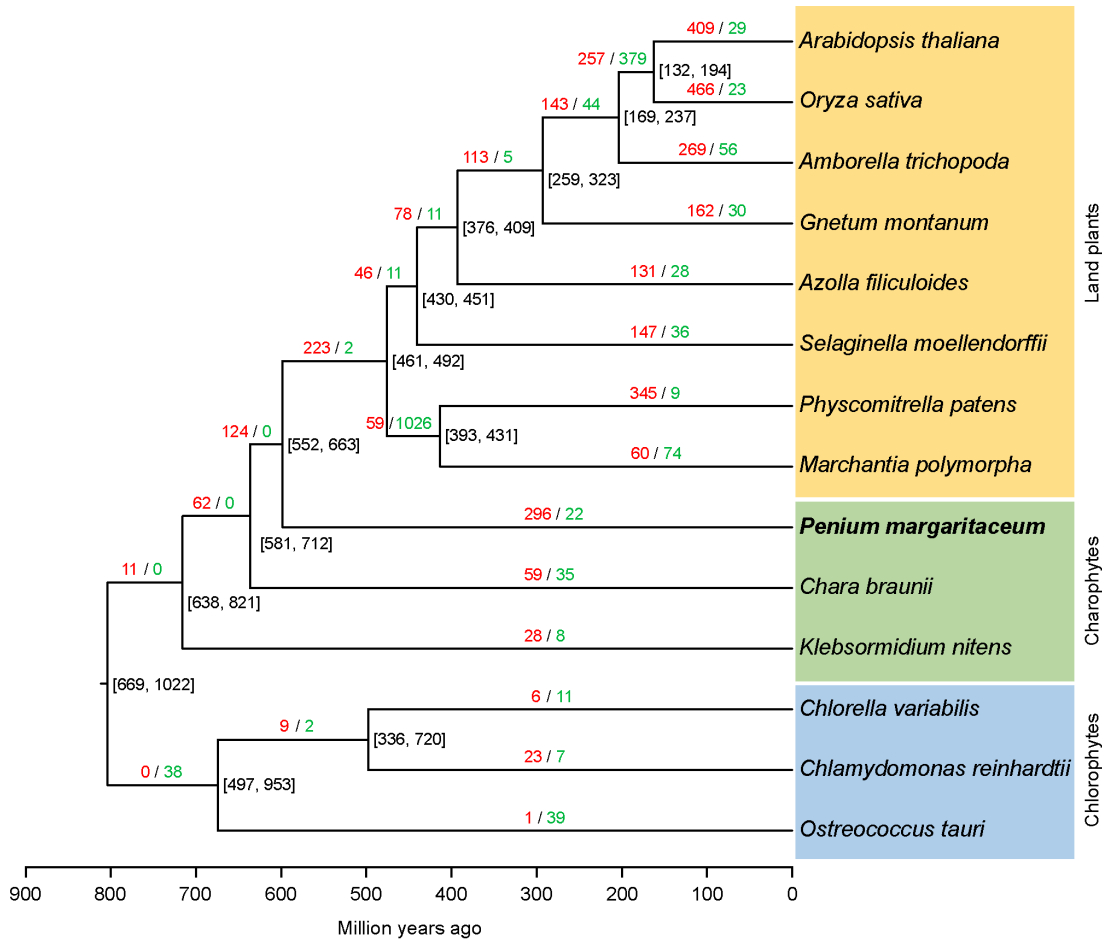

B

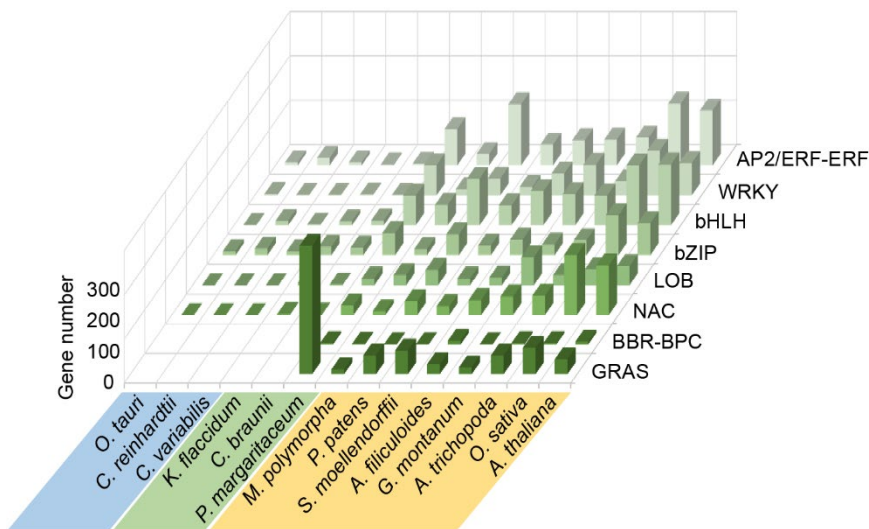

C

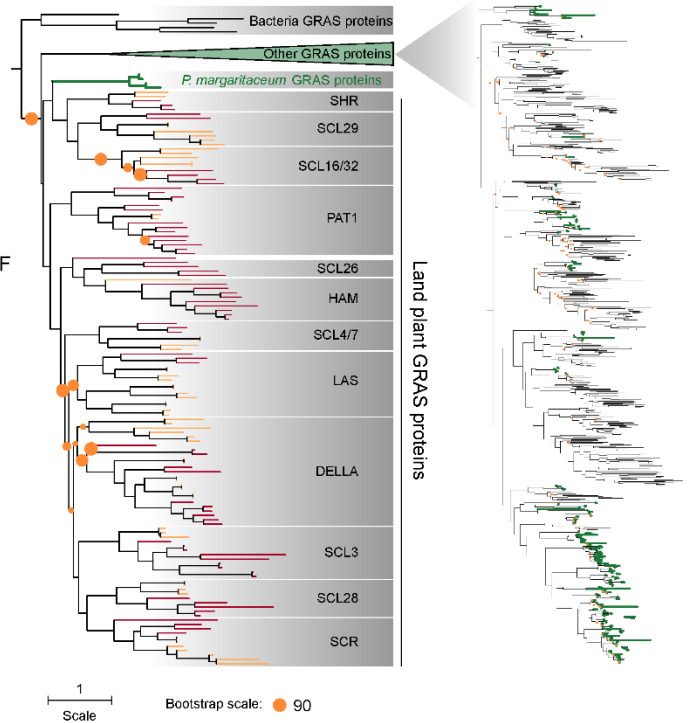



## Figure 5

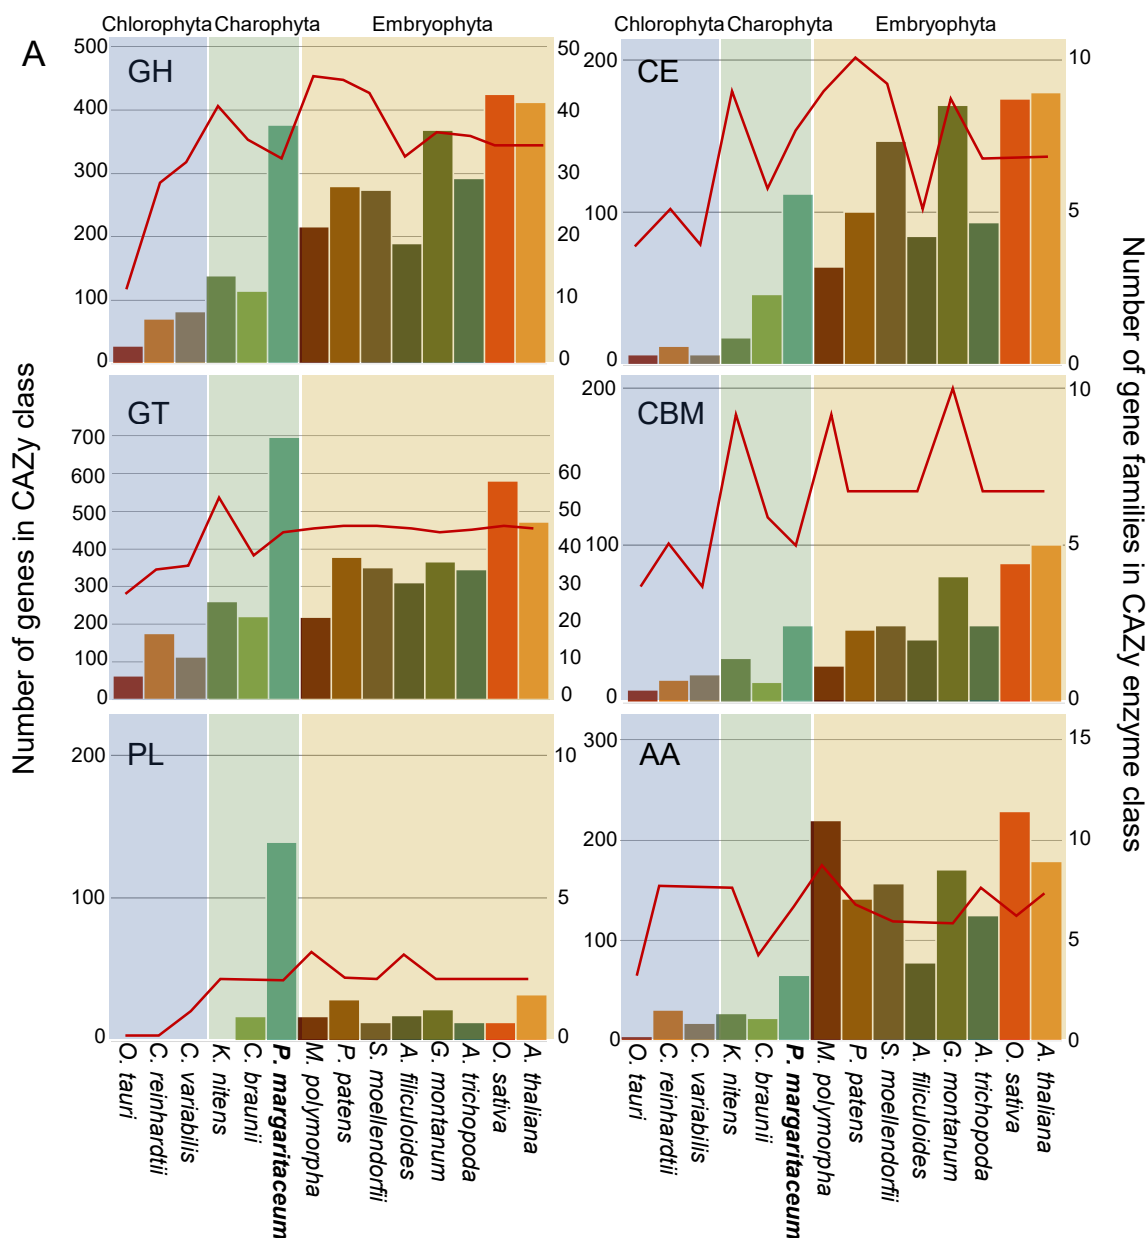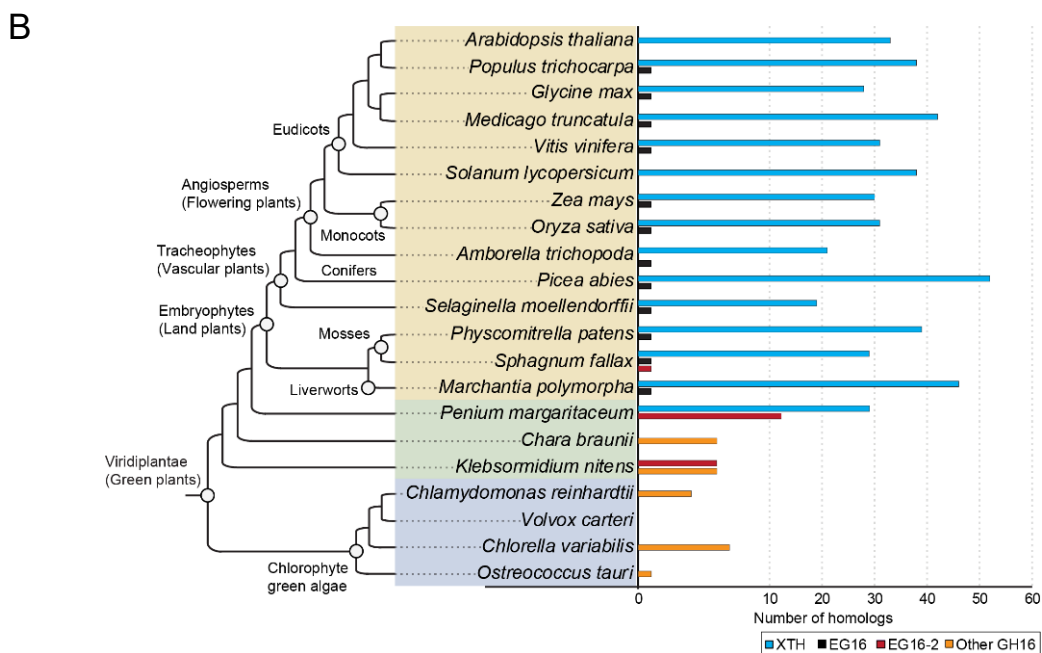

Figure 6

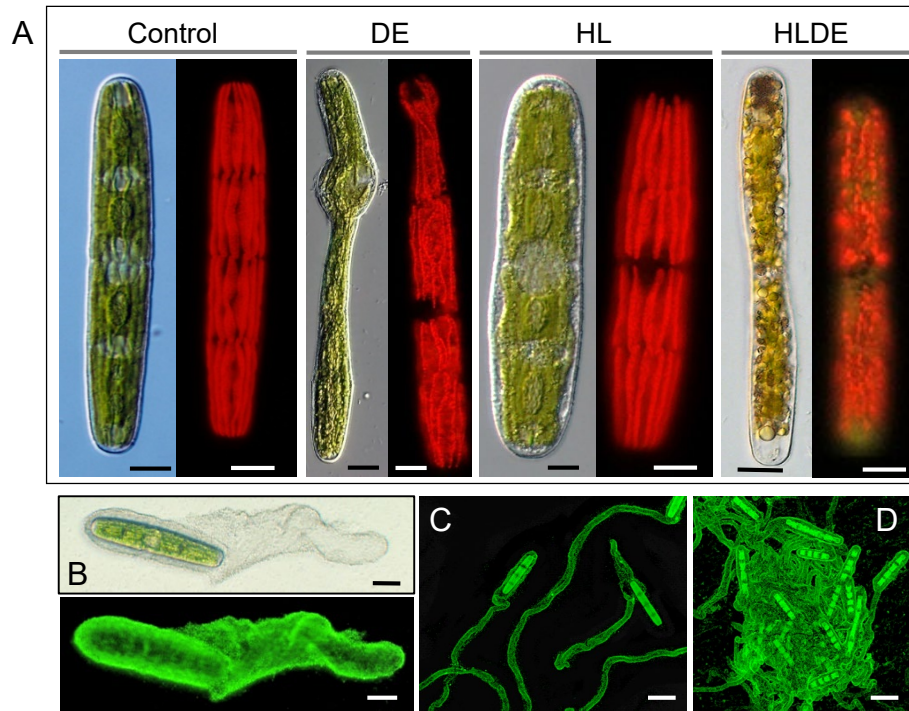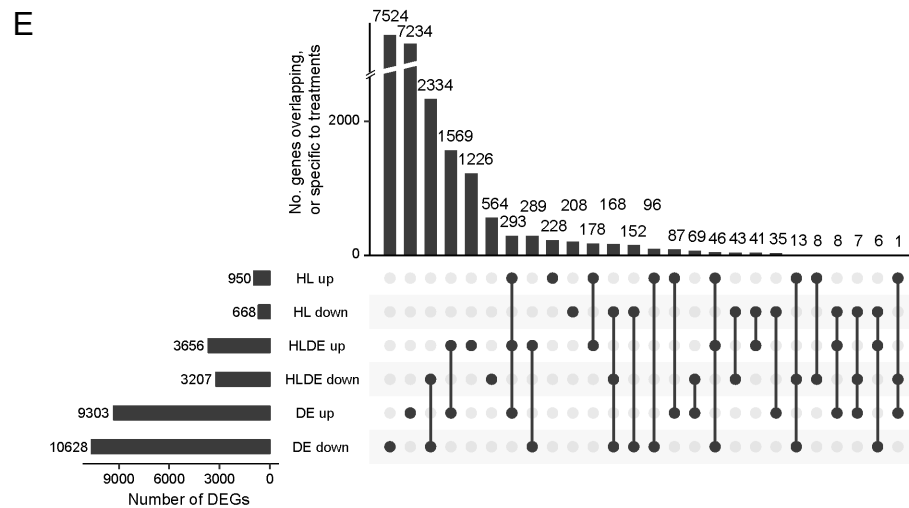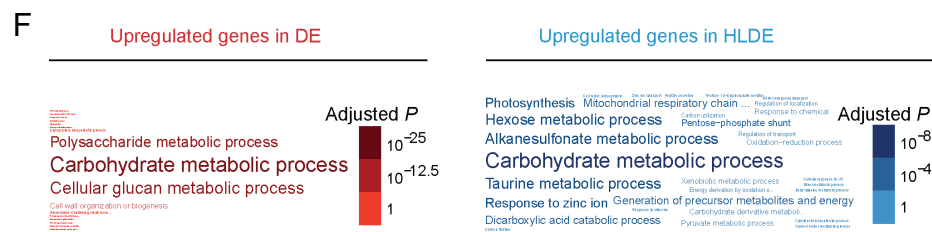

Source: https://www.biorxiv.org/content/biorxiv/early/2019/11/08/835561.full.pdf
